# Supplementary material
Source: PubMed Central journal article supplement (PMC5874133)
Supplement: NIHMS950395-supplement-supplement_1.pdf [file NIHMS950395-supplement-supplement_1.pdf]

**S. Culina, A.I. Lalanne et al., Islet-reactive CD8<sup>+</sup> T-cell frequencies in the pancreas but not blood distinguish type 1 diabetes from healthy donors.**

**Supplementary Materials**

**Materials and Methods.**

**Fig. S1.** Cytokine secretion and cytotoxicity of ZnT8<sub>186-194</sub>-reactive CD8<sup>+</sup> T cells from T1D patient D222D.

**Fig. S2.** CD8<sup>+</sup> T-cell recognition and HLA-A2 binding of ZnT8<sub>186-194</sub> and ZnT8<sub>185-194</sub> epitope variants.

**Fig. S3.** Ag sensitivity correlates with Ag avidity and polyfunctionality in ZnT8<sub>186-194</sub>-reactive CD8<sup>+</sup> T-cell clones.

**Fig. S4.** Modulation of HLA Class I and ZnT8 expression in human β-cell lines.

**Fig. S5.** TCR sequences of ZnT8<sub>186-194</sub>-reactive CD8<sup>+</sup> T-cell clones.

**Fig. S6.** ZnT8<sub>186-194</sub>-reactive clonotype-specific TaqMan assays.

**Fig. S7.** Gating strategy for the analysis of ZnT8<sub>186-194</sub>, MelanA<sub>26-35</sub> and Flu MP<sub>58-66</sub> MMr<sup>+</sup>CD8<sup>+</sup> T cells.

**Fig. S8.** IFN-γ secretion by ZnT8<sub>186-194</sub>-reactive CD8<sup>+</sup> T cells.

**Fig. S9.** Gene expression in *ex-vivo* single-sorted ZnT8<sub>186-194</sub> MMr<sup>+</sup>CD8<sup>+</sup> T cells.

**Fig. S10.** Extended combinatorial MMr panel for the analysis of multiple islet-reactive CD8<sup>+</sup> T-cell populations, and reproducibility of *ex-vivo* MMr assays.

**Fig. S11.** CD27, CD28 and CD95 expression on ZnT8<sub>186-194</sub>-reactive CD8<sup>+</sup> T cells.

**Fig. S12.** Representative MMr and CD45RA/CCR7 dot plots for HLA-A2<sup>+</sup> and HLA-A2<sup>-</sup> healthy donors depicted in Fig. 6F-G.

**Fig. S13.** Correlation between the frequency of MMr<sup>+</sup>CD8<sup>+</sup> T cells and the Ag-experienced fraction within the same MMr<sup>+</sup>CD8<sup>+</sup> population.

**Table S1.** Summary of ZnT8<sub>186-194</sub>-reactive CD8<sup>+</sup> T-cell clones.

**Table S2.** Characteristics of study subjects for *in-silico* TRB analyses.

**Table S3.** Characteristics of HLA-A2<sup>+</sup> study subjects for *ex-vivo* MMr studies.

**Table S4.** Characteristics of HLA-A2<sup>+</sup> and HLA-A2<sup>-</sup> healthy donors for *ex-vivo* MMr studies.

**Table S5.** Characteristics of nPOD cases for *in-situ* ZnT8<sub>186-194</sub> MMr staining.

**Table S6.** Primers used for gene expression analysis of the individual ZnT8<sub>186-194</sub> MMr<sup>+</sup>CD8<sup>+</sup> T cells depicted in Fig. S9A.

**Members of the ImMaDiab Study Group.**

**Excel file.** Raw data from figure graphs.

## Materials and Methods

*Study design.* The objective of this study was to identify the features of islet-reactive CD8<sup>+</sup> T cells that associate with T1D. Hypotheses were formulated on a prospective basis guided by the data. Based on a detailed analysis of ZnT8<sub>186-194</sub>-reactive CD8<sup>+</sup> T-cell clones (listed in Table S1), we initially hypothesized that peripheral autoreactivity occurs independently of disease status. This hypothesis was substantiated using HLA-A2 MMrs to quantify and characterize islet-reactive CD8<sup>+</sup> T cells directly *ex-vivo* (donors listed in Table S3). Next, we hypothesized that this widespread autoimmune repertoire stems from a universal leakiness of central tolerance, which was verified by thymic gene expression studies and by comparing HLA-A2-restricted Ag-reactive CD8<sup>+</sup> T-cell population frequencies in HLA-A2<sup>+</sup> vs. HLA-A2<sup>-</sup> donors (listed in Table S4). Finally, we hypothesized that the lack of distinguishing features in the periphery reflects sequestration of the disease-relevant subset in the pancreas. This hypothesis was confirmed by *in-situ* MMr staining of pancreatic sections (donors listed in Table S5). Following power analysis, age/sex-matched, unblinded case-control sets were selected from donors recruited at affiliated Diabetology Units. Samples were processed in batch, and no outliers were excluded. All *in-vitro* experiments were performed on at least two separate occasions. For *ex-vivo* MMr analyses, undersampled data-points were excluded, as detailed in Fig. 5-6.

*Study approval.* All subjects provided written informed consent. Ethical approval was granted by the Comité de Protection des Personnes Ile de France 1-2 (AOR10049, K091101, A01094-53) and by the Institutional Review Boards of the Cambridge Royal Free Hospital (08/H0720/25), the Benaroya Research Institute (7109-147), the University of Heidelberg (367/2002) and the University of Florida Health Center (nPOD Project). The ImMaDiab study is registered at [www.clinicaltrials.gov](http://www.clinicaltrials.gov) (NCT01747967).

*Peptides, MMrs and HLA-A2 binding measurements.* Peptides ZnT8<sub>186-194</sub> (VAANIVLTV) and its *B. stercoris* WP\_060386636.1 mimotope (KAANIVLTV), ZnT8<sub>185-194</sub> (AVAANIVLTV), MelanA<sub>26-35</sub> (A27L variant; ELAGIGILTV), Flu MP<sub>58-66</sub> (GILGFVFTL), PPI<sub>6-14</sub> (RLLPLLALL), PPI<sub>15-24</sub> (ALWGPDPAAA), GAD<sub>114-122</sub> (VMNILLQYV), IA-2<sub>805-813</sub> (VIVMLTPLV), IGRP<sub>265-273</sub> (VLFGLGFAI), EboV NP<sub>202-210</sub> (RLMRTNFLI) and HCV PP<sub>1406-1415</sub> (KLVALGINAV) were synthesized at >85% purity (ChinaPeptides). Peptide-HLA-A2 affinity and stability assays were performed as detailed in Fig. S2. HLA-A2 MMrs were produced as described (39), and staining was performed in the presence of 50 nM dasatinib (11). For Fig. 2B, MMr MFIs were normalized to that of D222D clone 2 in the presence of dasatinib.

*Cloning of ZnT8<sub>186-194</sub>-reactive CD8<sup>+</sup> T cells.* Frozen-thawed PBMCs (2-10x10<sup>6</sup>) were stained with dual fluorochrome-labeled ZnT8<sub>186-194</sub> MMrs, either directly *ex-vivo* or after 10 days of acDC culture (8) in the absence or presence of 1 μM peptide (ZnT8<sub>186-194</sub> or ZnT8<sub>185-194</sub>). Double-positive events were then sorted as single cells into individual wells of a U-bottom 96-well plate. Each sort well contained 200,000 irradiated PBMCs, 5% Cellkines (Zeptomatrix), 200 IU/ml Proleukin, 25 ng/ml IL-15, 1 μg/ml phytohemagglutinin (PHA)-L (Sigma), penicillin/streptomycin and amphotericin B. Medium was replenished every 3 days

without PHA-L. Expanding clones were selected by visual inspection, transferred into 48-well plates for specificity testing and restimulated as above every 2-3 weeks.

*Antigen recall assays.* Peptide-pulsed HLA-A2<sup>+</sup> LCLs or K562 cells transduced with HLA-A2, CD80 and 4-1BBL (a kind gift from Dr. J. Riley, University of Pennsylvania, Philadelphia, PA) were labeled with CellTrace Violet (Life Technologies) and incubated with T cells at an E/T ratio of 2/1 for 6 h in the presence of 10 µg/ml brefeldin A. Intracellular cytokine staining was performed using BD Cytotfix/Cytoperm reagents and analyzed using a BD LSR Fortessa cytometer. CD107a staining was performed with a FITC-labeled mAb (clone H4A3, BD). Polyfunctionality indices were calculated as described (12).

*Cytotoxicity assays.* LCL, K562-A2 or K562-A2/ZnT8 target cells were labeled with CellTrace FarRed (Life Technologies), dispensed into 96-well flat-bottom plates at 10<sup>5</sup> cells/well and co-cultured with different numbers of CFSE-labeled T cells for 6-24 h. After staining with Live/Dead Aqua (Life Technologies) and fixation, a set number of CompBeads (BD) was added to each well. Flow cytometric analysis was performed by counting the numbers of CFSE<sup>-</sup>FarRed<sup>+</sup>Live/Dead<sup>-</sup> targets for each condition, normalized to equal numbers of CompBeads. Percent lysis was calculated as 100 × (live targets cultured alone) – (live targets in the presence of T cells) / (live targets cultured alone). Blocking experiments were conducted with concanamycin A (100 nM; Sigma), brefeldin A (5 µg/ml; Sigma) and the anti-FasL antibody NOK-1 (5 µg/ml; BD).

The EndoC-βH2 cell line (HLA-A\*01/03, -B\*07/08, -C\*07/07) was described previously (40), and the ECN90 cell line (HLA-A\*02:01/03, -B\*40/49, -C\*03/07) was derived from a human neonatal pancreas using similar protocols. Real-time cytotoxicity assays on β-cell lines were performed using the xCELLigence system (ACEA Biosciences). Briefly, β cells were dispensed into 96-well E-plates and pretreated as indicated. After resting for 20 h and pulsing with 10 µM peptide or DMSO for 2 h, T cells were added at an E/T ratio of 2/1, and impedance was recorded every 5-15 min for 4 h. Cell indices were normalized to values at the time of T-cell addition (t=0) and transformed to percent lysis.

*TCR sequencing, in-silico analyses and clonotype-specific TaqMan assays.* *TRA* and *TRB* gene expression was analyzed using a template-switch anchored RT-PCR (41) for T-cell clones and a multiplex nested PCR (42) for single-sorted cells. Gene usage was determined according to the ImmunoGeneTics (IMGT) nomenclature.

The *TRB* database (Adaptive Biotechnologies) used for *in-silico* analyses was derived from the donors listed in Table S2. TaqMan assays (Life Technologies; Fig. S6) were applied to cDNA samples from naïve (CD45RA<sup>+</sup>CCR7<sup>+</sup>) and Ag-experienced (CD45RA<sup>+</sup>CCR7<sup>-</sup> or CD45RA<sup>-</sup>CCR7<sup>+/-</sup>) CD4<sup>+</sup> and CD8<sup>+</sup> T cells bulk-sorted from age/sex-matched cohorts incorporating 83 T1D patients [age 34 years (17-59), 51% females, T1D duration 8 years (0.1-55), 51% HLA-A2<sup>+</sup>] and 93 healthy donors [age 34 years (17-60), 47% females, 41% HLA-A2<sup>+</sup>]. cDNA samples were amplified using clonotype-specific TaqMan primers for 18 cycles, followed by real-time qPCR using clonotype-specific TaqMan assays on Fluidigm 96.96 microfluidic chips with a BioMark HD qPCR system. Amplification curves for

individual assays were examined and compared with curves from a *TRB* constant region assay as a control for *TRB* templates in each reaction.

*Ex-vivo analysis of ZnT8<sub>186-194</sub>-reactive CD8<sup>+</sup> T cells.* Cryopreserved PBMCs from T1D and healthy donors (Table S3) were magnetically depleted of CD8<sup>-</sup> cells (StemCell Technologies), stained with the combinatorial MMr panels (9) detailed in Fig. S7 and S10 and acquired using a BD FACSAria III cytometer. IFN- $\gamma$  ELISpot assays were performed as described (7). Single-cell gene expression analysis is detailed in Fig. S9A and Table S6.

*Gene expression in human mTECs.* Human thymus samples were obtained from children undergoing corrective cardiac surgery at the University of Heidelberg, Germany. mTECs were purified as described (13). Sorted total, immature and mature mTECs (CD45<sup>-</sup> EpCAM<sup>+</sup>CDR2<sup>-</sup>) were independently validated for gene expression of the tissue-restricted Ags  $\beta$ -casein and MelanA (13). Amplified bands were sequenced to confirm identity with the expected *SLC30A8* and *INS* regions. *SLC30A8* exons were annotated with reference to Ensembl ID ENST00000427715. The *INS* PCR covered all *INS* transcripts except ENST00000512523 (product 1) and ENST00000421783 (product 2).

*In-situ ZnT8<sub>186-194</sub> MMr staining.* *In-situ* staining was performed as described (2). Briefly, unfixed, frozen sections were dried for 2 h, loaded with 1  $\mu$ g of MMrs overnight at 4°C, washed gently with phosphate-buffered saline and fixed in 2% paraformaldehyde for 10 min. After a further wash, endogenous peroxidase activity was blocked with 0.3% H<sub>2</sub>O<sub>2</sub>. Sections were then incubated serially with rabbit anti-phycoerythrin, horseradish peroxidase-conjugated swine anti-rabbit and 3,3'-diaminobenzidine tetrahydrochloride substrate (Thermo Scientific). After a final wash, sections were counterstained with hematoxylin, dehydrated *via* sequential passages in 95-100% ethanol and xylene, mounted and analyzed using a Nikon Eclipse Ni microscope with NIS-Elements Analysis D software v4.40.

*Statistical analysis.* Data are shown as median (range) or mean $\pm$ SEM. Significance was assessed using two-tailed tests with a cut-off value of  $\alpha=0.05$ , as detailed for each figure.

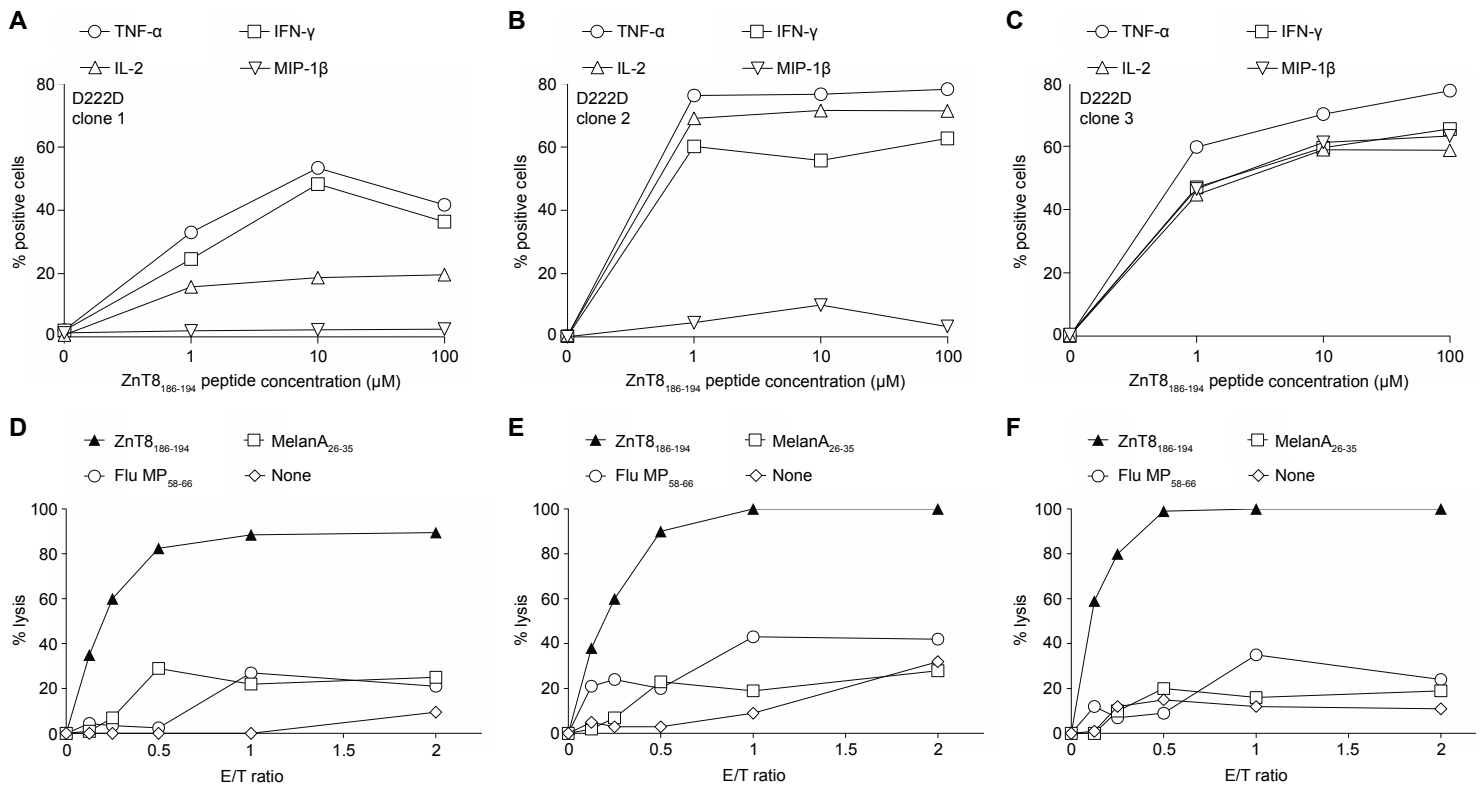

**Fig. S1. Cytokine secretion and cytotoxicity of ZnT8<sub>186-194</sub>-reactive CD8<sup>+</sup> T cells from T1D patient D222D.** (A-C) D222D clone 1 (A), 2 (B) or 3 (C) were stimulated for 6 h with K562-A2 cells pulsed with the indicated peptide concentrations. Graphs display percent intracellular cytokine<sup>+</sup> cells calculated after gating on viable CD8<sup>+</sup> cells, as shown in Fig. 1C. The following antibodies were used: anti-TNF-α-APC (clone MAb11, BD), anti-IFN-γ-PE (clone 4S.B3, eBioscience), anti-IL-2-PE/Cy7 (clone MQ1-17H12, eBioscience) and anti-MIP-1β-FITC (clone 24006, R&D). (D-F) FarRed-labeled HLA-A2<sup>+</sup> LCL target cells were pulsed with the indicated peptides and cultured with CFSE-labeled D222D clones 1 (D), 2 (E) or 3 (F) at increasing E/T ratios. Live FarRed<sup>+</sup> target cells were counted at 24 h and normalized to a fixed number of beads added to each well. Percent lysis is plotted for each graph, calculated as  $100 \times (\text{live targets cultured alone}) - (\text{live targets in the presence of T cells}) / (\text{live targets cultured alone})$ . Results are representative of three independent experiments. For panels A-C, results are shown from a separate experiment than depicted in Fig. 1C. For panels D-F, results are shown from the three separate clones, with raw data for D222D clone 3 depicted in Fig. 1D, and pooled data for all three clones depicted in Fig. 1E.

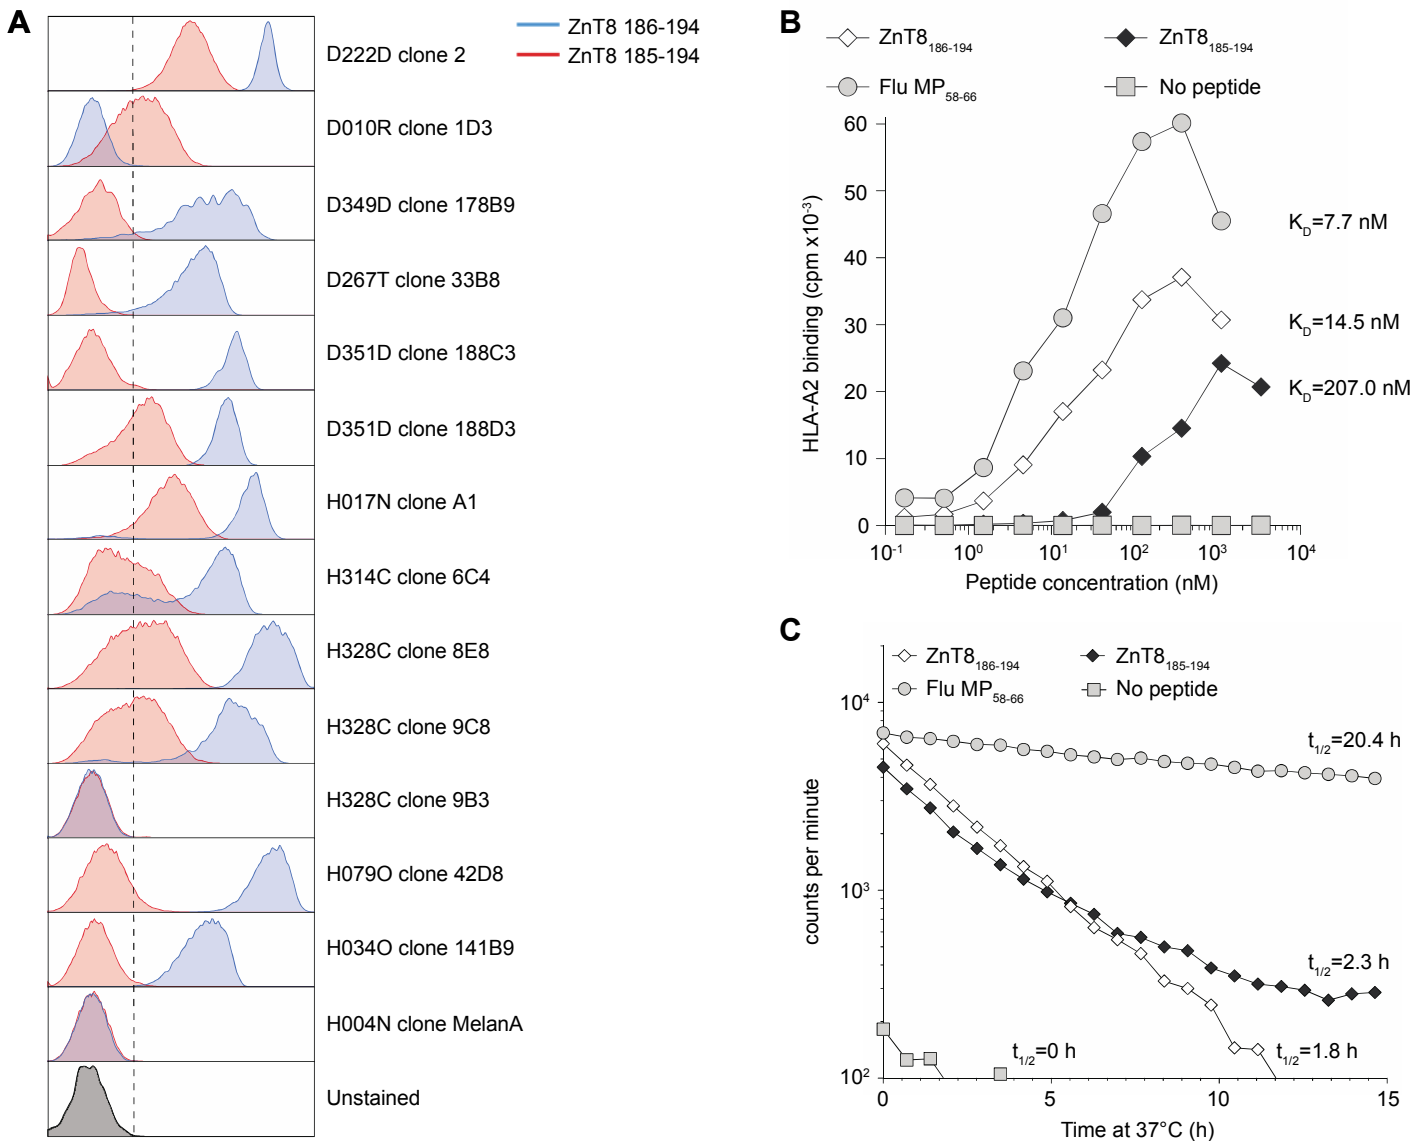

**Fig. S2. CD8<sup>+</sup> T-cell recognition and HLA-A2 binding of ZnT8<sub>186-194</sub> and ZnT8<sub>185-194</sub> epitope variants.** (A) The indicated clones were stained with HLA-A2 MMrs loaded with either ZnT8<sub>186-194</sub> (VAANIVLTV; blue profiles) or ZnT8<sub>185-194</sub> (AVAANIVLTV; red profiles) in the presence of dasatinib. MMr fluorescence intensities registered in separate runs were made comparable by using the same flow cytometer settings, by recalibrating the cytometer for each run using Spherotech Rainbow Calibration particles, and by including a reference D222D clone (thawed cryovials from the same freeze) in all experiments. The MMr fluorescence registered in each run for the reference D222D clone was also used to further normalize the median fluorescence intensities plotted in Fig. 2B. (B) *In-vitro* HLA-A2 binding affinity measurements for the ZnT8<sub>186-194</sub> (white diamonds) and ZnT8<sub>185-194</sub> peptides (black diamonds). Recombinant HLA-A2 (0.7 nM) was mixed in 96-well polypropylene plates (Nunc) with  $\beta_2$ -microglobulin ( $\beta_2$ M; 25-50 nM) and the indicated peptide (5-fold titrations) in phosphate-buffered saline supplemented with 0.1% Lutrol F-68 and allowed to form complexes at 18°C for 48 h. Amounts of each peptide-HLA complex were determined using an AlphaScreen assay (Perkin Elmer) with streptavidin-conjugated donor beads and W6/32 anti-HLA Class I antibody-conjugated acceptor beads. Peptide-HLA complexes (10  $\mu$ l) were transferred to 384-well OptiPlates (Perkin Elmer) in duplicates, mixed with 30  $\mu$ l each of streptavidin-conjugated donor beads and W6/32-conjugated acceptor beads, and

incubated in the dark for 6-8 h at room temperature. Plates were analyzed using an Envision reader (Perkin Elmer). (C) *In-vitro* HLA-A2 stabilization assays with the ZnT8<sub>186-194</sub> and ZnT8<sub>185-194</sub> peptides. Recombinant HLA-A2 molecules were incubated with the indicated peptides and the corresponding dissociation rates were monitored over time. Briefly, biotinylated recombinant HLA-A2 (30 nM) was mixed with peptide (10 mM) and <sup>125</sup>I-labeled β<sub>2</sub>M (25,000 cpm/well), transferred to a 96-well FlashPlatePlus (Perkin Elmer), and allowed to form complexes overnight at 18°C. Dissociation was initiated by adding unlabeled β<sub>2</sub>M at a final concentration of 360 nM and monitored by consecutively reading the microplates in a TopCount NXT scintillation counter (Perkin Elmer) at 37°C for 15 h. K<sub>D</sub> affinity (B) and half-life (t<sub>1/2</sub>) values (C) are displayed, as calculated using a non-linear regression fit (GraphPad Prism 5). Results are representative of three independent experiments.

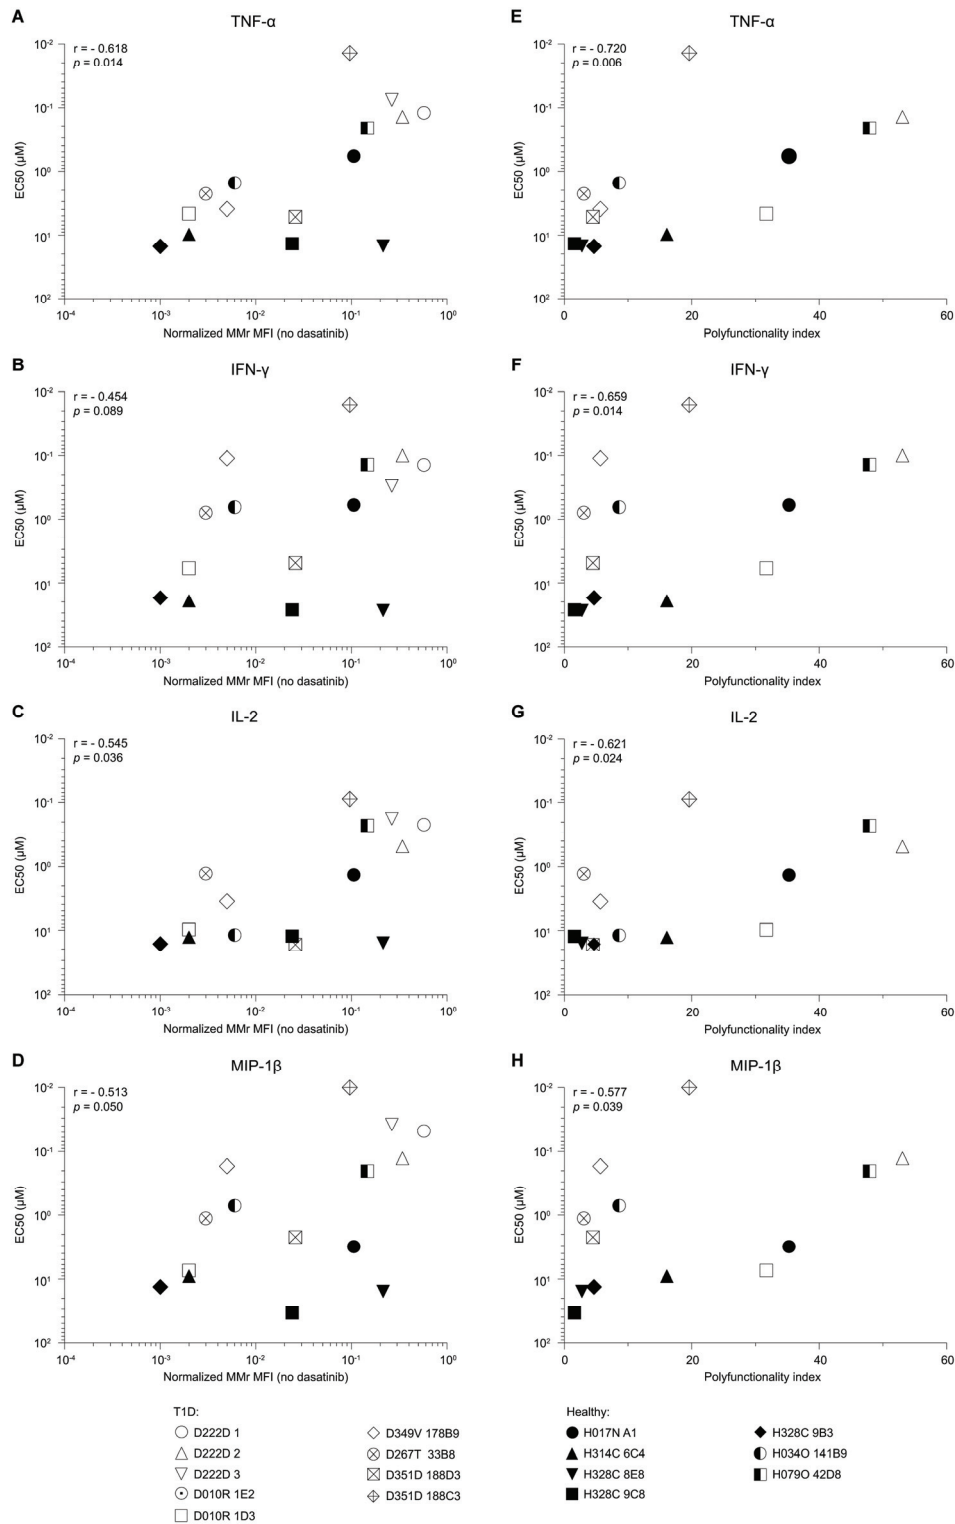

**Fig. S3. Ag sensitivity correlates with Ag avidity and polyfunctionality in ZnT8<sub>186-194</sub>-reactive CD8<sup>+</sup> T-cell clones.** (A-D) The indicated CD8<sup>+</sup> T-cell clones generated from T1D and healthy subjects (white and black symbols, respectively, as in Fig. 2) were compared for normalized MMr MFI in the absence of dasatinib (from Fig. 2B; x-axis) vs. ZnT8<sub>186-194</sub> peptide EC50 for the indicated cytokine responses (from Fig. 2D; y-axis). EC50 values are plotted from higher to lower, corresponding to increasing Ag sensitivity. (E-H) The same clones were compared for polyfunctionality index (from Fig. 2F; x-axis) vs. ZnT8<sub>186-194</sub> peptide EC50 (as in panels A-D). The corresponding Spearman  $r$  and  $p$  values are displayed for each panel.



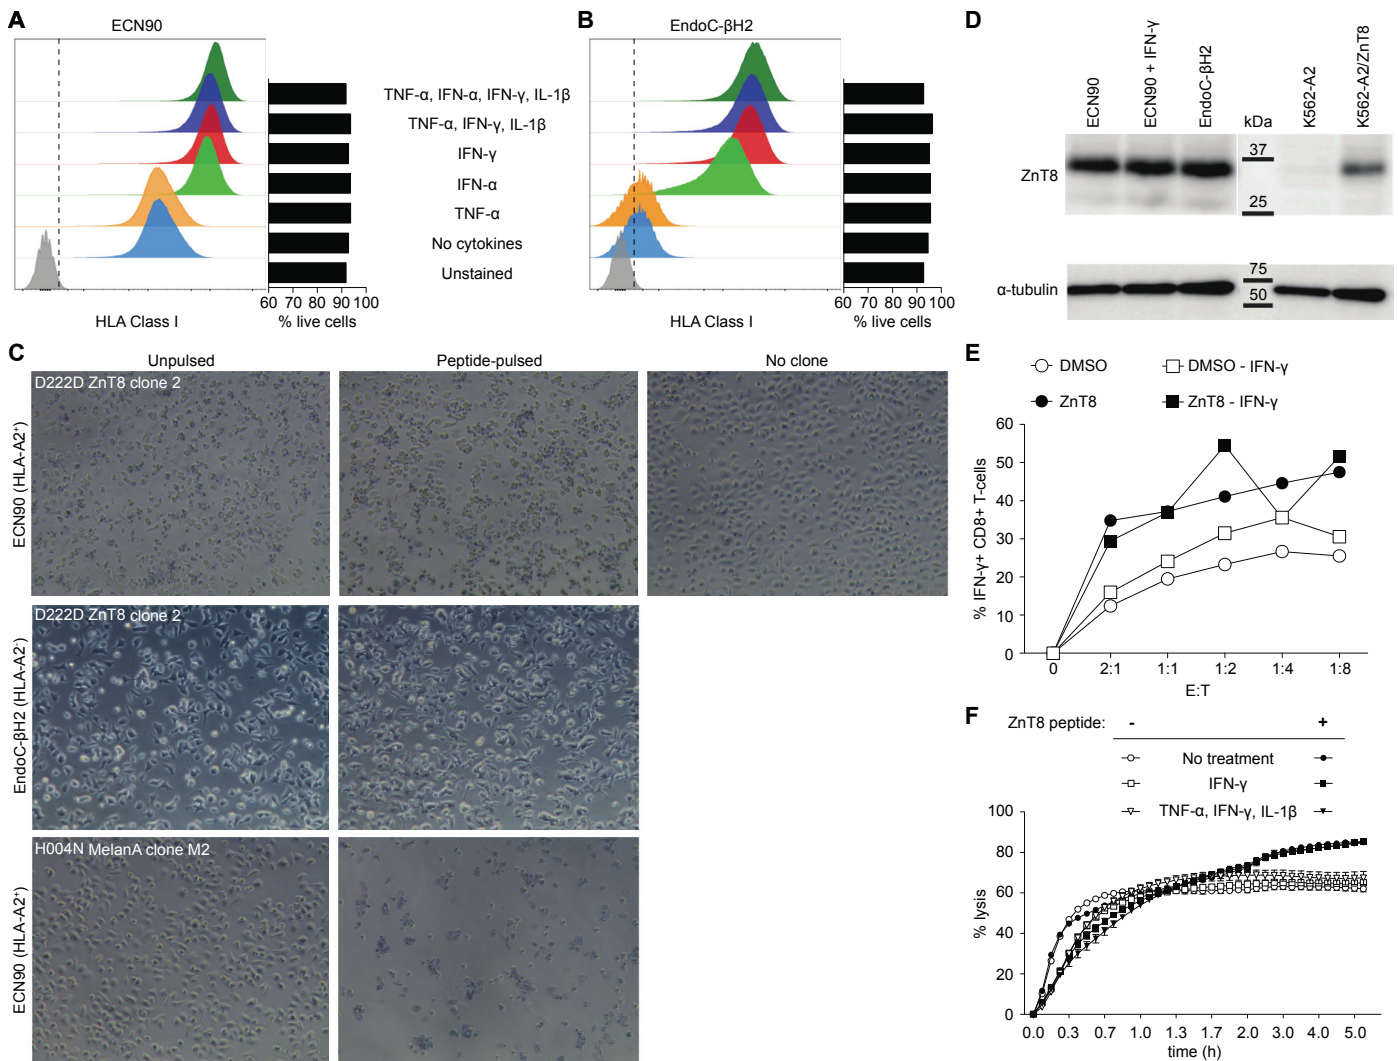

**Fig. S4. Modulation of HLA Class I and ZnT8 expression in human  $\beta$ -cell lines. (A-B)** Surface HLA Class I expression (anti-HLA-A, B, C antibody W6/32, labeled in-house with AlexaFluor647) and Live/Dead Red viability of HLA-A2<sup>+</sup> ECN90 (A) and HLA-A2<sup>-</sup> EndoC- $\beta$ H2 cell lines (B) with and without exposure to the indicated cytokines for 18 h. The following cytokine cocktails were used: TNF- $\alpha$  alone (1,100 U/ml); IFN- $\alpha$  alone (500 U/ml); IFN- $\gamma$  alone (500 U/ml); TNF- $\alpha$ , IFN- $\gamma$  and IL-1 $\beta$  (1,100 U/ml, 2,000 U/ml and 1,000 U/ml, respectively); TNF- $\alpha$ , IFN- $\alpha$ , IFN- $\gamma$  and IL-1 $\beta$  (2,500 U/ml, 1,000 U/ml, 500 U/ml and 50 U/ml, respectively). Results are representative of three independent experiments. (C) Representative optical microscopy images (10X magnification) of wells in which ZnT8<sub>186-194</sub>-reactive D222D clones or MelanA<sub>26-35</sub>-reactive clones were co-cultured with HLA-A2<sup>+</sup> ECN90 or HLA-A2<sup>-</sup> EndoC- $\beta$ H2 cells for the cytotoxicity assays depicted in Fig. 3D-G. T cells were removed by gentle washing and the remaining cells were stained with Trypan Blue. Two independent experiments were performed. (D) ZnT8 expression in ECN90 and EndoC- $\beta$ H2  $\beta$ -cell lines pretreated with or without IFN- $\gamma$  (500 U/ml, 18 h), as assessed by Western blot using an anti-ZnT8 antibody (clone 17H2.4, produced in-house). K562-A2 cells transduced or not with a full-length ZnT8 plasmid are shown as positive and negative controls, respectively.  $\alpha$ -tubulin expression is shown as a loading control. (E) IFN- $\gamma$  recall

assay for D222D clone 2 on ECN90 cells pretreated with or without IFN- $\gamma$  (500 U/ml, 18 h), washed and pulsed with DMSO or 10  $\mu$ M ZnT8<sub>186-194</sub> peptide for 2 h. A fixed number of T-cell effectors was co-cultured with increasing numbers of ECN90 targets for 6 h. Percent IFN- $\gamma$ <sup>+</sup> cells was calculated from plots gated on viable CD8<sup>+</sup> cells. (F) Real-time cytotoxicity assays for D222D clone 2 in the presence of ECN90 cells (E/T ratio 2/1) pretreated with or without the indicated cytokines for 18 h. Results in panels D-F are representative of at least two independent experiments.

| D222D Clones 1, 2, 3    |                                                         |                 |  |
|-------------------------|---------------------------------------------------------|-----------------|--|
| TCRβ                    | C A S S I E G P T G E L F                               | N-region length |  |
| TCRB V <sub>NDN</sub> J | tg <b>tgccag</b> tagtataga <b>ggggcc</b> accgggagctgttt | 1               |  |
| TRBV19*01               | tg <b>tgccag</b> tagtataga                              |                 |  |
| TRBD1*01                | gggaca <b>ggggc</b>                                     |                 |  |
| TRBJ2*01                | cgaa <b>ccaccggg</b> agctgttt                           |                 |  |
| TCRα                    | C A V T G A N N L F F                                   | N-region length |  |
| TCRA V <sub>N</sub> J   | tg <b>tgcg</b> taactgggcaacaactcttcttt                  | 3               |  |
| TRAV17*01               | tg <b>tgctac</b> ggag                                   |                 |  |
| TRAJ36*01               | tc <b>saactggg</b> caacaactcttcttt                      |                 |  |

  

| D010R clone 1E2         |                                               |                 |  |
|-------------------------|-----------------------------------------------|-----------------|--|
| TCRβ                    | C A S G G S V E Q Y F                         | N-region length |  |
| TCRB V <sub>NDN</sub> J | tg <b>tgccag</b> cggggaagctcctacgagcagtaacttc | 3               |  |
| TRBV19*01               | tg <b>tgccag</b> tagtataga                    |                 |  |
| TRBD2*01                | gggactag <b>cgggggg</b>                       |                 |  |
| TRBJ2*01                | ctcctacgagcagtaacttc                          |                 |  |
| TCRα                    | C A G T R N N L F F                           | N-region length |  |
| TCRA V <sub>N</sub> J   | tg <b>tgctgga</b> agcggaacaactcttcttt         | 6               |  |
| TRAV35*02               | tg <b>tgctg</b>                               |                 |  |
| TRAJ36*01               | tc <b>saactggg</b> caacaactcttcttt            |                 |  |

  

| D010R clone 1D3         |                                                 |                 |  |
|-------------------------|-------------------------------------------------|-----------------|--|
| TCRβ                    | C A S S S V G V D T Q Y F                       | N-region length |  |
| TCRB V <sub>NDN</sub> J | tg <b>tgccagcagctct</b> gtggggtagatagcagctatttt | 7               |  |
| TRBV6-1*01              | tg <b>tgccagcag</b> ctgaagc                     |                 |  |
| TRBD1*01                | gggaca <b>ggggc</b>                             |                 |  |
| TRBJ2-3*01              | agccagatacagcagctatttt                          |                 |  |
| TCRα                    | C A G G S N D Y K L S F                         | N-region length |  |
| TCRA V <sub>N</sub> J   | tg <b>tgcaagg</b> gcttaacgactacaagctcagcttt     | 3               |  |
| TRAV25*02               | tg <b>tgcaagg</b>                               |                 |  |
| TRAJ20*01               | gttctaacgactacaagctcagcttt                      |                 |  |

  

| D267T 33B6              |                                                        |                 |  |
|-------------------------|--------------------------------------------------------|-----------------|--|
| TCRβ                    | C A S S I F P N P G N T I Y F                          | N-region length |  |
| TCRB V <sub>NDN</sub> J | tg <b>tgccagtagtat</b> ctccagaccctggaaacaccatatttt     | 11              |  |
| TRBV19*01               | tg <b>tgccagtag</b> tataga                             |                 |  |
| TRBD                    |                                                        |                 |  |
| TRBJ1-3*01              | ctctggaaacaccatatttt                                   |                 |  |
| TCRα                    | C A L S E A T Y N Q G G K L I F                        | N-region length |  |
| TCRA V <sub>N</sub> J   | tg <b>tgctctgagtag</b> ggccttataaccaggaggaaagcttatcttc | 3               |  |
| TRAV19*01               | tg <b>tgctctgag</b> taggc                              |                 |  |
| TRAJ23*01               | tgatttataaccaggaggaaagcttatcttc                        |                 |  |

  

| D349D 178B9             |                                                      |                 |  |
|-------------------------|------------------------------------------------------|-----------------|--|
| TCRβ                    | C A S S P F L T G S N T E A F F                      | N-region length |  |
| TCRB V <sub>NDN</sub> J | tg <b>tgccagcagccct</b> ctcagagctggaacactgaagctttttt | 11              |  |
| TRBV11-2*01             | tg <b>tgccagcag</b> cttaga                           |                 |  |
| TRBD1*01                | gggacagggggc                                         |                 |  |
| TRBJ1-1*01              | tgaa <b>caactga</b> agctttcttt                       |                 |  |
| TCRα                    | C A M R E G L T G G F K T I F                        | N-region length |  |
| TCRA V <sub>N</sub> J   | tg <b>tgcaatgagagaggg</b> ccaactgagggcttcaaaactatttt | 2               |  |
| TRAV14/DV4*03           | tg <b>tgcaatgagagaggg</b>                            |                 |  |
| TRAJ9*01                | ggaa <b>taactgaggg</b> cttcaaaactatttt               |                 |  |

  

| D351D 188D3             |                                                       |                 |  |
|-------------------------|-------------------------------------------------------|-----------------|--|
| TCRβ                    | C A S T L T G F A E A F F                             | N-region length |  |
| TCRB V <sub>NDN</sub> J | tg <b>tgccagta</b> cttgacagggctcgctgaagctttttt        | 8               |  |
| TRBV19*01               | tg <b>tgccagtag</b> tataga                            |                 |  |
| TRBD1*01                | gggacagggggc                                          |                 |  |
| TRBJ1-1*01              | tgaa <b>caactga</b> agctttcttt                        |                 |  |
| TCRα                    | C A I S P A E T S D Y K L S F                         | N-region length |  |
| TCRA V <sub>N</sub> J   | tg <b>tgctatgagccggct</b> gagcaagcagactacaagctcagcttt | 15              |  |
| TRAV19*01               | tg <b>tgctatgag</b> taggc                             |                 |  |
| TRAJ20*01               | gttctaacgactacaagctcagcttt                            |                 |  |

  

| H017N Clone A1          |                                                      |                 |  |
|-------------------------|------------------------------------------------------|-----------------|--|
| TCRβ                    | C A S S P S W L S G V T Q Y F                        | N-region length |  |
| TCRB V <sub>NDN</sub> J | tg <b>tgccagcagccct</b> ctggcttctcggggttacgagctatttt | 16              |  |
| TRBV7-2*02              | tg <b>tgccagcag</b> cttag                            |                 |  |
| TRBD1*01                | gggaca <b>ggggc</b>                                  |                 |  |
| TRBJ2-3*01              | agccagatacagcagctatttt                               |                 |  |
| TCRα                    | C A V D M G N T P L V F                              | N-region length |  |
| TCRA V <sub>N</sub> J   | tg <b>tgccgtggaca</b> tggaacacacactctgtcttt          | 2               |  |
| TRAV39*01               | tg <b>tgccgtggaca</b>                                |                 |  |
| TRAJ29*01               | ca <b>ggaa</b> acacacactctgtcttt                     |                 |  |

  

| H0340 141B9             |                                            |                 |  |
|-------------------------|--------------------------------------------|-----------------|--|
| TCRβ                    | C A S S D Q E T Q Y F                      | N-region length |  |
| TCRB V <sub>NDN</sub> J | tg <b>tgccagcagtag</b> taagagaccagctacttc  | 1               |  |
| TRBV25-1*01             | tg <b>tgccagcag</b> taata                  |                 |  |
| TRBD                    |                                            |                 |  |
| TRBJ2-5*01              | acaagagaccagctacttc                        |                 |  |
| TCRα                    | C A L R S G Y A L N F                      | N-region length |  |
| TCRA V <sub>N</sub> J   | tg <b>tgctctcaca</b> tcgggtatgcaactcaacttc | 6               |  |
| TRAV38-2/DV8*01         | tg <b>tgcttatagg</b> agcg                  |                 |  |
| TRAJ41*01               | ga <b>actcaaat</b> tcgggtatgcaactcaacttc   |                 |  |

  

| H0790 42D8              |                                                      |                 |  |
|-------------------------|------------------------------------------------------|-----------------|--|
| TCRβ                    | C A S S I V S S S Y N E Q F F                        | N-region length |  |
| TCRB V <sub>NDN</sub> J | tg <b>tgccagtagtat</b> gttctctctcacaatagcagctcttc    | 7               |  |
| TRBV19*01               | tg <b>tgccagtag</b> tataga                           |                 |  |
| TRBD                    |                                                      |                 |  |
| TRBJ2-1*01              | ctcctacaatagcagctcttc                                |                 |  |
| TCRα                    | C A V R D I F N A G N M L T F                        | N-region length |  |
| TCRA V <sub>N</sub> J   | tg <b>tgctctgagagaca</b> ctttaatgcaggcaactgctcaacttt | 3               |  |
| TRAV3*01                | tg <b>tgctgtagagaca</b>                              |                 |  |
| TRAJ39*01               | tgaa <b>taataat</b> gcaggcaactgctcaacttt             |                 |  |

  

| H087N 157C3             |                                                       |                 |  |
|-------------------------|-------------------------------------------------------|-----------------|--|
| TCRβ                    | C A S R A G S F S T D T Q Y F                         | N-region length |  |
| TCRB V <sub>NDN</sub> J | tg <b>tgccagcagagcaggg</b> ctcttagcagatacagcagctatttt | 7               |  |
| TRBV27*01               | tg <b>tgccagcag</b> tttctc                            |                 |  |
| TRBD1*01                | gggacagggggc                                          |                 |  |
| TRBJ2-3*01              | agccagatacagcagctatttt                                |                 |  |
| TCRα                    | C A F Y S G G G A D G L T F                           | N-region length |  |
| TCRA V <sub>N</sub> J   | tg <b>tgcttctat</b> tcagggaggtgctgacggaactcaacttt     | 0               |  |
| TRAV38-1*01             | tg <b>tgcttctca</b> gagca                             |                 |  |
| TRAJ45*01               | tg <b>ttctcagggaggt</b> gctgacggaactcaacttt           |                 |  |

  

| H328C Clone 8E8         |                                                          |                 |  |
|-------------------------|----------------------------------------------------------|-----------------|--|
| TCRβ                    | C A S S Q E G T A Y E Q Y F                              | N-region length |  |
| TCRB V <sub>NDN</sub> J | tg <b>tgccagcagcca</b> aggggacagctcagcagcagctacttc       | 1               |  |
| TRBV4-2*01              | tg <b>tgccagcagcca</b> aga                               |                 |  |
| TRBD1*01                | gggacagggggc                                             |                 |  |
| TRBJ2-7*01              | ctcctacagcagcagctacttc                                   |                 |  |
| TCRα                    | C A A S G T L T T S G T Y K Y I F                        | N-region length |  |
| TCRA V <sub>N</sub> J   | tg <b>tgccagcag</b> tggaaccctaacctcaggaactcaaaatcacacttt | 10              |  |
| TRAV29/DV5*01           | tg <b>tgccagcag</b> cg                                   |                 |  |
| TRAJ40*01               | actacctcaggaactcaaaatcacacttt                            |                 |  |

  

| H328C Clone 9B3         |                                                             |                 |  |
|-------------------------|-------------------------------------------------------------|-----------------|--|
| TCRβ                    | C A S S P W T G I F Y N S P L H F                           | N-region length |  |
| TCRB V <sub>NDN</sub> J | tg <b>tgccagcagccgt</b> gggacagggatcccctataatcccccctcaacttt | 8               |  |
| TRBV9*01                | tg <b>tgccagcag</b> ctag                                    |                 |  |
| TRBD1*01                | gggacagggggc                                                |                 |  |
| TRBJ1-6*02              | ctcctataatcccccctcaacttt                                    |                 |  |
| TCRα                    | C A V V R T Q G G S E K L V F                               | N-region length |  |
| TCRA V <sub>N</sub> J   | tg <b>tgctgtg</b> tcagaaactcgggctgctgaaagctggtttt           | 6               |  |
| TRAV21*01               | tg <b>tgctgtg</b>                                           |                 |  |
| TRAJ57*01               | ta <b>actcaggg</b> cgatctgaaagctggtttt                      |                 |  |

  

| H328C Clone 9C8         |                                                          |                 |  |
|-------------------------|----------------------------------------------------------|-----------------|--|
| TCRβ                    | C A S S E V G Q G F N G Y T F                            | N-region length |  |
| TCRB V <sub>NDN</sub> J | tg <b>tgccagcagtag</b> agtgggacagggatcttaatggctacacacttc | 7               |  |
| TRBV25-1*01             | tg <b>tgccagcag</b> taata                                |                 |  |
| TRBD1*01                | gggacagggggc                                             |                 |  |
| TRBJ1-2*01              | ctaacctatggctacacacttc                                   |                 |  |
| TCRα                    | C A G I L S Y G Q N F V F                                | N-region length |  |
| TCRA V <sub>N</sub> J   | tg <b>tgcaaggcattctct</b> ctatggtcagaattttgtcttt         | 9               |  |
| TRAV25*01               | tg <b>tgcaagg</b>                                        |                 |  |
| TRAJ26*01               | gggata <b>actatggtcaga</b> attttgtcttt                   |                 |  |

  

| H314C Clone 6C4         |                                                        |                 |  |
|-------------------------|--------------------------------------------------------|-----------------|--|
| TCRβ                    | C A S Q S Y R V G S E Q Y F                            | N-region length |  |
| TCRB V <sub>NDN</sub> J | tg <b>tgccagtcagag</b> ttacagggctgggtccagcagcagctacttc | 15              |  |
| TRBV6-5*01              | tg <b>tgccagcag</b> ttactc                             |                 |  |
| TRBD1*01                | gggacagggggc                                           |                 |  |
| TRBJ2-7*01              | ctcctacagcagcagctacttc                                 |                 |  |
| TCRα                    | C L L M E Y G N K L V F                                | N-region length |  |
| TCRA V <sub>N</sub> J   | tg <b>gtctctc</b> atggaataggaacaagctggtttt             | 5               |  |
| TRAV40*01               | tg <b>gtctct</b> gggaga                                |                 |  |
| TRAJ47*02               | tgga <b>atgga</b> acaagctggtttt                        |                 |  |
| TCRα                    | C A F P P Y Q N F V F                                  | N-region length |  |
| TCRA V <sub>N</sub> J   | tg <b>gtctttt</b> ctctatggtcagaattttgtcttt             | 8               |  |
| TRAV38-2/DV8*01         | tg <b>gtcttatagg</b> agcg                              |                 |  |
| TRAJ26*01               | gggata <b>actatggtcaga</b> attttgtcttt                 |                 |  |

**Fig. S5. TCR sequences of ZnT8<sub>186-194</sub>-reactive CD8<sup>+</sup> T-cell clones.** Clones isolated from T1D patients are shown on the left and clones isolated from healthy donors are shown on the right. Nucleotide sequences rearranged from the indicated V (green), D (black) and J (blue) genes are shown for each clone. Nucleotide additions at the V-D, D-J and V-J junctions are shown in red and the corresponding N-region length is indicated (right column).



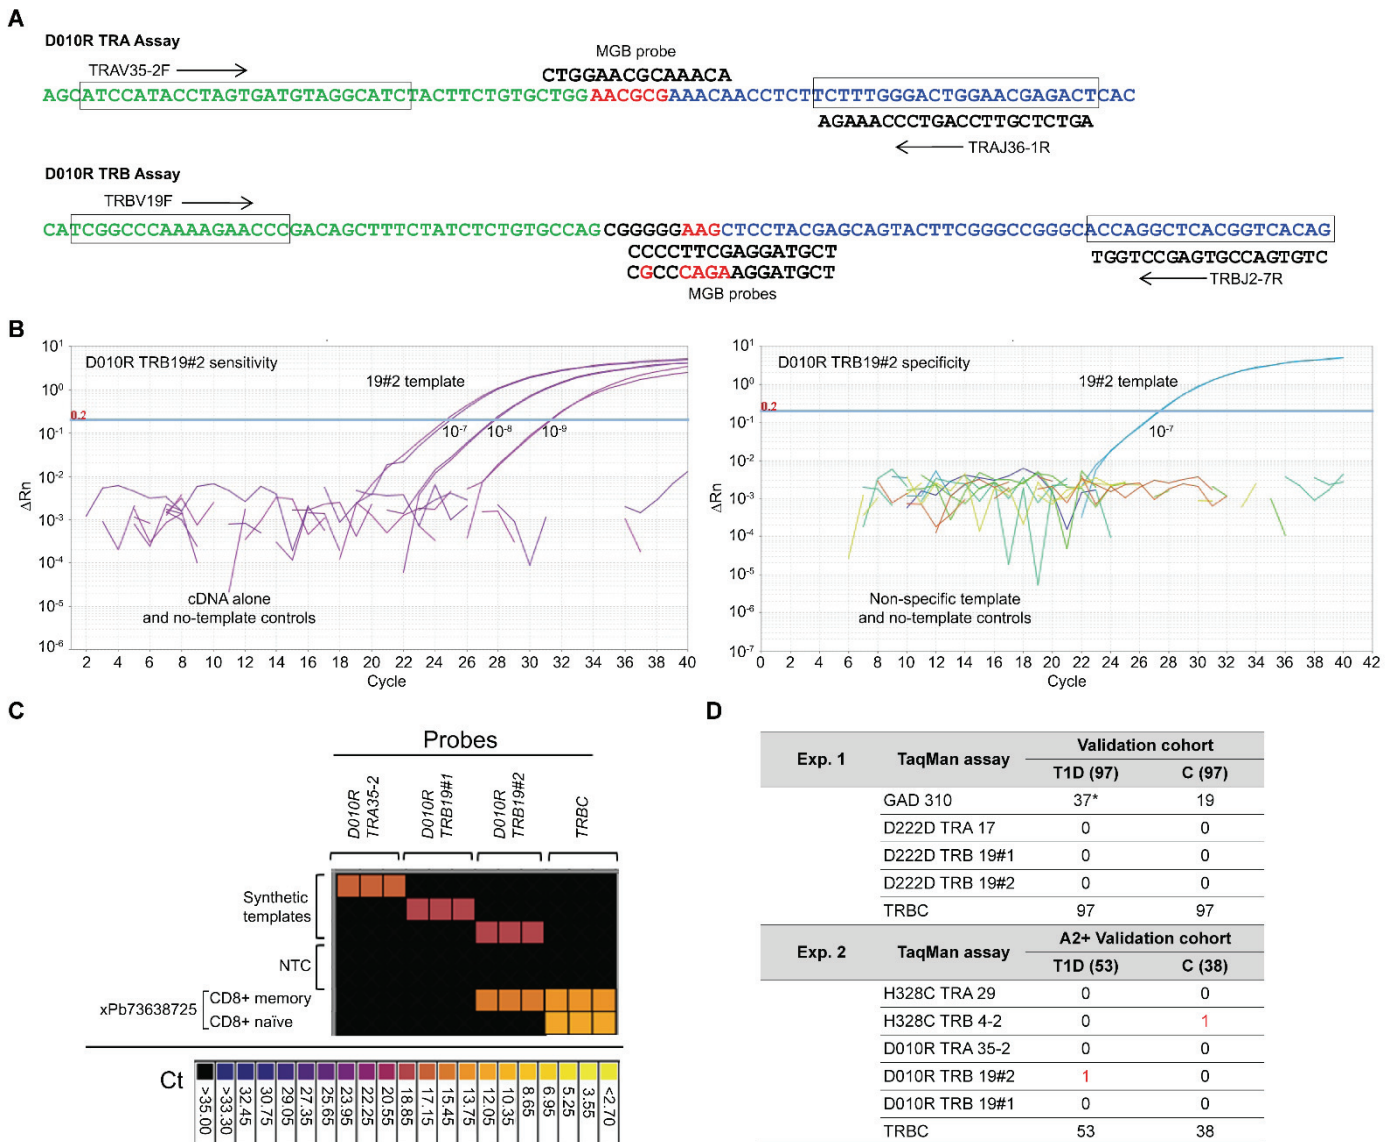

**Fig. S6. ZnT8<sub>186-194</sub>-reactive clonotype-specific TaqMan assays.** (A) TaqMan assays were designed for the ZnT8<sub>186-194</sub>-reactive CDR3 regions of the rearranged *TRA* (top) and *TRB* genes (bottom) from clones D010R 1E2, H328C 8E8 and D222D by placing forward primers in the V region and reverse primers in the J region of each transcript (black fonts). A 6-carboxyfluorescein (FAM)-labeled minor groove binder (MGB) probe was designed to cover the unique N(D)N region of each chain. For *TRBV19*<sup>+</sup> CDR3β regions (clones D010R and D222D), two unique nucleotide sequences were screened using two different probes (TRB19#1 and TRB19#2). Sequences corresponding to the V, D, N and J regions are shown in green, black, red and blue, respectively. The example shows TaqMan assays for the D010R clonotype. (B) Clonotype-specific TaqMan assays were validated using synthetic DNA templates (Life Technologies) for clonotype-specific or irrelevant *TRA* and *TRB* sequences. Ten-fold dilutions of the templates (from 10<sup>-7</sup> to 10<sup>-9</sup>; left panel, purple profiles) were spiked into naïve CD8<sup>+</sup> T-cell cDNA and amplified by qPCR. As shown for the D010R TRB19#2 probe, the sensitivity was 10<sup>-9</sup>, equivalent to 100 copies of template (equivalent to ~1 T cell). The right panel shows that non-specific DNA templates and no-template controls (colored profiles) were not amplified. The blue line marks the detection threshold, set at a change in normalized reporter value (ΔRn) of 0.2. (C) Clonotype-specific TaqMan assays were used to screen cDNA from pooled naïve (CD45RA<sup>+</sup>CCR7<sup>+</sup>) or Ag-experienced (CD45RA<sup>+</sup>CCR7<sup>-</sup> or

CD45RA<sup>-</sup>CCR7<sup>+/-</sup>) CD4<sup>+</sup> or CD8<sup>+</sup> T cells isolated from T1D or age/sex-matched healthy donors. Samples were pre-amplified with the pooled clonotype assays, and the products were used for real-time qPCR on a Fluidigm platform. Representative results are shown for the D010R *TRA* and *TRB* probes depicted in panels A-B, along with a *TRBC* probe included as a positive control for *TRB* templates in each sample. Results are shown for T1D patient xPb73638725 testing positive on memory and negative on naïve CD8<sup>+</sup> T cells. NTC, no-template controls. **(D)** Summary of the results obtained by screening T1D and control (C) healthy donors (number of subjects indicated in parentheses) with the D222D ZnT8 and control GAD clonotype-specific probes (experiment 1, top panel) and with the H328C and D010R clonotype-specific probes (experiment 2, bottom panel; only HLA-A2<sup>+</sup> subjects were analyzed). The number of subjects with  $\geq 1$  positive sample for each of the indicated assays is reported.

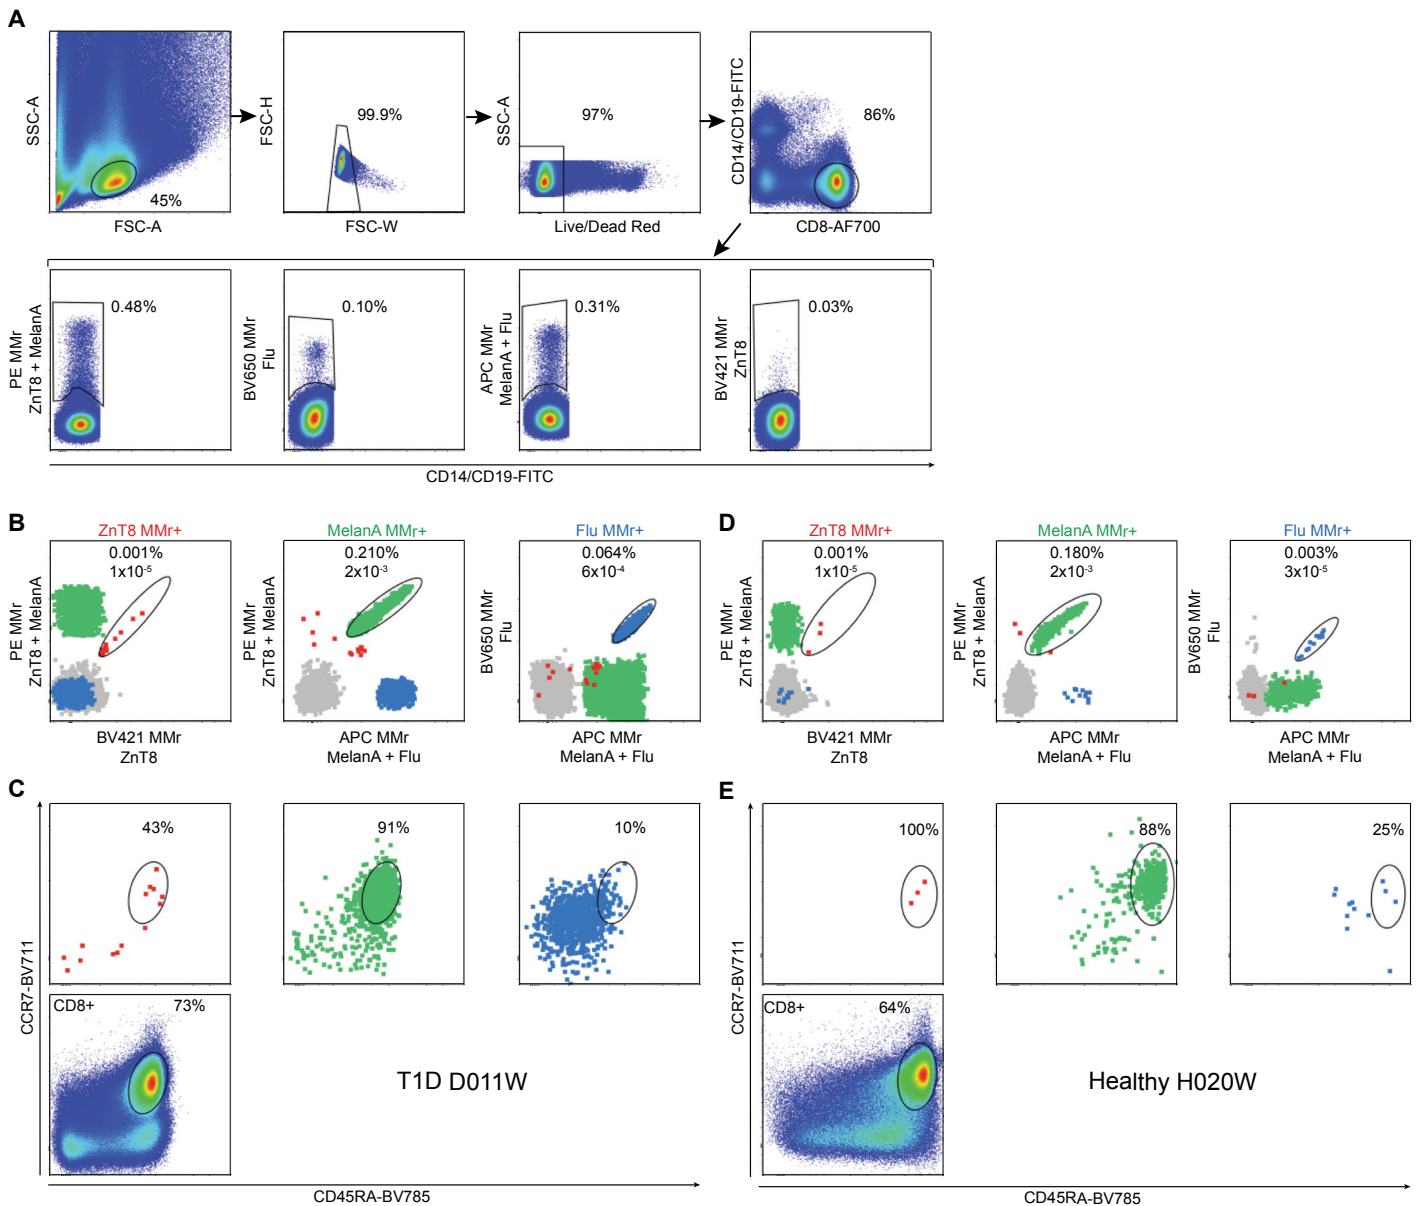

**Fig. S7. Gating strategy for the analysis of ZnT8<sub>186-194</sub>, MelanA<sub>26-35</sub> and Flu MP<sub>58-66</sub> MMr<sup>+</sup>CD8<sup>+</sup> T cells.** (A) After magnetic depletion of CD8<sup>-</sup> cells in frozen-thawed PBMCs from T1D patient #D011W, cells were sequentially gated on small lymphocytes, singlets, live cells (Live/Dead Red<sup>-</sup>), CD8<sup>+</sup> T cells (FITC-CD14/CD19<sup>-</sup>, AlexaFluor700-CD8<sup>+</sup>; clones 61D3, HIB19, RPA-T8, respectively; eBioscience) and total PE<sup>+</sup>, BV650<sup>+</sup>, APC<sup>+</sup> and BV421<sup>+</sup> MMr<sup>+</sup> T cells. ZnT8<sub>186-194</sub> MMr-PE/BV421<sup>+</sup>, MelanA<sub>26-35</sub> MMr-PE/APC<sup>+</sup> and Flu MP<sub>58-66</sub> MMr-APC/BV650<sup>+</sup> events were visualized using the gating strategy previously detailed for combinatorial MMr staining (9) and FlowJo v10 software (Tree Star). The staining panel also included anti-CD45RA-BV785 (clone HI100, BioLegend) and anti-CCR7-BV711 (clone 150503, BD). (B) The final readout obtained for T1D patient #D011W after gating out events positive for <2 or >2 MMr fluorochromes is shown, with events corresponding to each epitope-reactive population depicted in different colors within each plot, and MMr<sup>-</sup> events depicted in grey. (C) Percent naïve (CD45RA<sup>+</sup>CCR7<sup>+</sup>) cells is shown after gating on the corresponding MMr<sup>+</sup> fractions, with the distribution of total CD8<sup>+</sup> T cells shown for comparison. Percent Ag-experienced fractions displayed in Fig. 5 included all cells not falling into the naïve gate (i.e. CD45RA<sup>+</sup>CCR7<sup>-</sup> and CD45RA<sup>-</sup>CCR7<sup>+/-</sup>). (D-E) The final readout of MMr<sup>+</sup> cells and naïve fractions is shown for healthy donor #H020W.

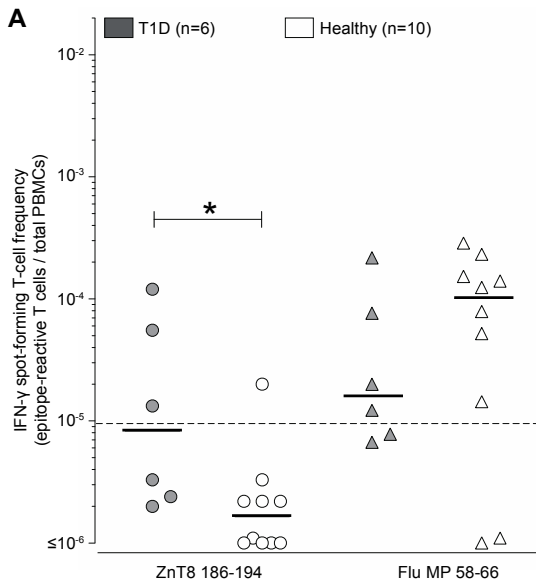

**B**

|              | % positive  |              | T1D (n=6) |       |       |       |       |       |       | Healthy (n=10) |       |       |       |       |       |       |       |       |  |
|--------------|-------------|--------------|-----------|-------|-------|-------|-------|-------|-------|----------------|-------|-------|-------|-------|-------|-------|-------|-------|--|
|              | T1D         | Healthy      | D001W     | D004W | D008W | D014W | D027W | D028W | H005W | H006W          | H015W | H015T | H017T | H314C | H316C | H297S | H356C | H372C |  |
| ZnT8 186-194 | 50.0% (3/6) | 10.0% (1/10) | 13.3      | 55.5  | 3.3   | 120.4 | 2.2   | 2.2   | 1.1   | 2.2            | 3.3   | 1.1   | 2.2   | 0.0   | 0.0   | 2.2   | 20.0  | 0.0   |  |
| Flu MP 58-66 | 66.7% (4/6) | 80.0% (8/10) | 217.6     | 76.6  | 6.7   | 7.8   | 20.0  | 12.2  | 52.2  | 124.3          | 286.4 | 139.9 | 1.1   | 232.0 | 14.4  | 78.8  | 153.2 | 0.0   |  |
| PHA          | 100% (6/6)  | 100% (10/10) | ++++      | ++++  | ++++  | ++++  | ++++  | ++++  | ++++  | ++++           | ++++  | ++++  | ++++  | ++++  | ++++  | ++++  | ++++  | ++++  |  |
| Basal+3SD    |             |              | 5.8       | 10.0  | 10.0  | 5.8   | 5.8   | 20.8  | 20.8  | 15.3           | 5.8   | 20.8  | 5.8   | 10.0  | 5.8   | 17.3  | 10.0  | 30.0  |  |
| Basal+4SD    |             |              | 7.7       | 13.3  | 13.3  | 7.7   | 7.7   | 27.7  | 27.7  | 20.3           | 7.7   | 27.7  | 7.7   | 13.3  | 7.7   | 23.1  | 13.3  | 40.0  |  |
| Basal+5SD    |             |              | 9.6       | 16.7  | 16.7  | 9.6   | 9.6   | 34.7  | 34.7  | 25.4           | 9.6   | 34.7  | 9.6   | 16.7  | 9.6   | 28.8  | 16.7  | 50.0  |  |
| Basal        |             |              | 1.1       | 3.3   | 3.3   | 7.8   | 2.2   | 7.8   | 11.1  | 4.4            | 1.1   | 12.2  | 1.1   | 3.3   | 4.4   | 6.7   | 3.3   | 13.3  |  |

**Fig. S8. IFN- $\gamma$  secretion by ZnT8<sub>186-194</sub>-reactive CD8<sup>+</sup> T cells.** (A) T1D and healthy donors previously analyzed by *ex-vivo* MMR staining for whom sufficient PBMCs remained were further analyzed by IFN- $\gamma$  ELISpot as described (7). Briefly, unfractionated PBMCs ( $3 \times 10^5$ /well) were plated in triplicate in anti-IFN- $\gamma$  antibody-coated ELISpot PVDF plates in the presence of 10  $\mu$ M ZnT8<sub>186-194</sub> or Flu MP<sub>58-66</sub> peptide or DMSO vehicle diluted in AIM-V medium supplemented with 0.5 U/ml IL-7. After 18 h, plates were revealed with biotin-conjugated anti-IFN- $\gamma$  antibodies (U-CyTech), alkaline phosphatase-conjugated streptavidin and NBT-BCIP substrate, and counted on a BioSys Bioreader 5000 Pro-SF. Results are expressed as frequencies of epitope-reactive T cells out of total PBMCs after subtraction of background responses in the presence of DMSO alone (which were  $\leq 10^{-5}$  in all cases). The dotted line represents the median cut-off for a positive response, which was set at 3 SDs above the average background for each individual, as previously determined by receiver-operator characteristics analysis (3). \* $p=0.03$  by Mann-Whitney test. (B) The corresponding raw IFN- $\gamma$  ELISpot counts. All values, including basal + nSD cutoffs, are expressed as spot-forming cells/ $10^6$  PBMCs with baseline subtraction. Non-subtracted basal values (reactivities to DMSO) are shown in the last row of each column. Reactivities are ranked as low (between 3 and 4 SD, yellow), intermediate (between 4 and 5 SD, orange), and high ( $>5$  SD, red). The percentage of T1D and healthy subjects positive for each epitope is indicated in the second and third column, respectively. PHA was used as a polyclonal positive control. +++++, off-scale ELISpot reading.

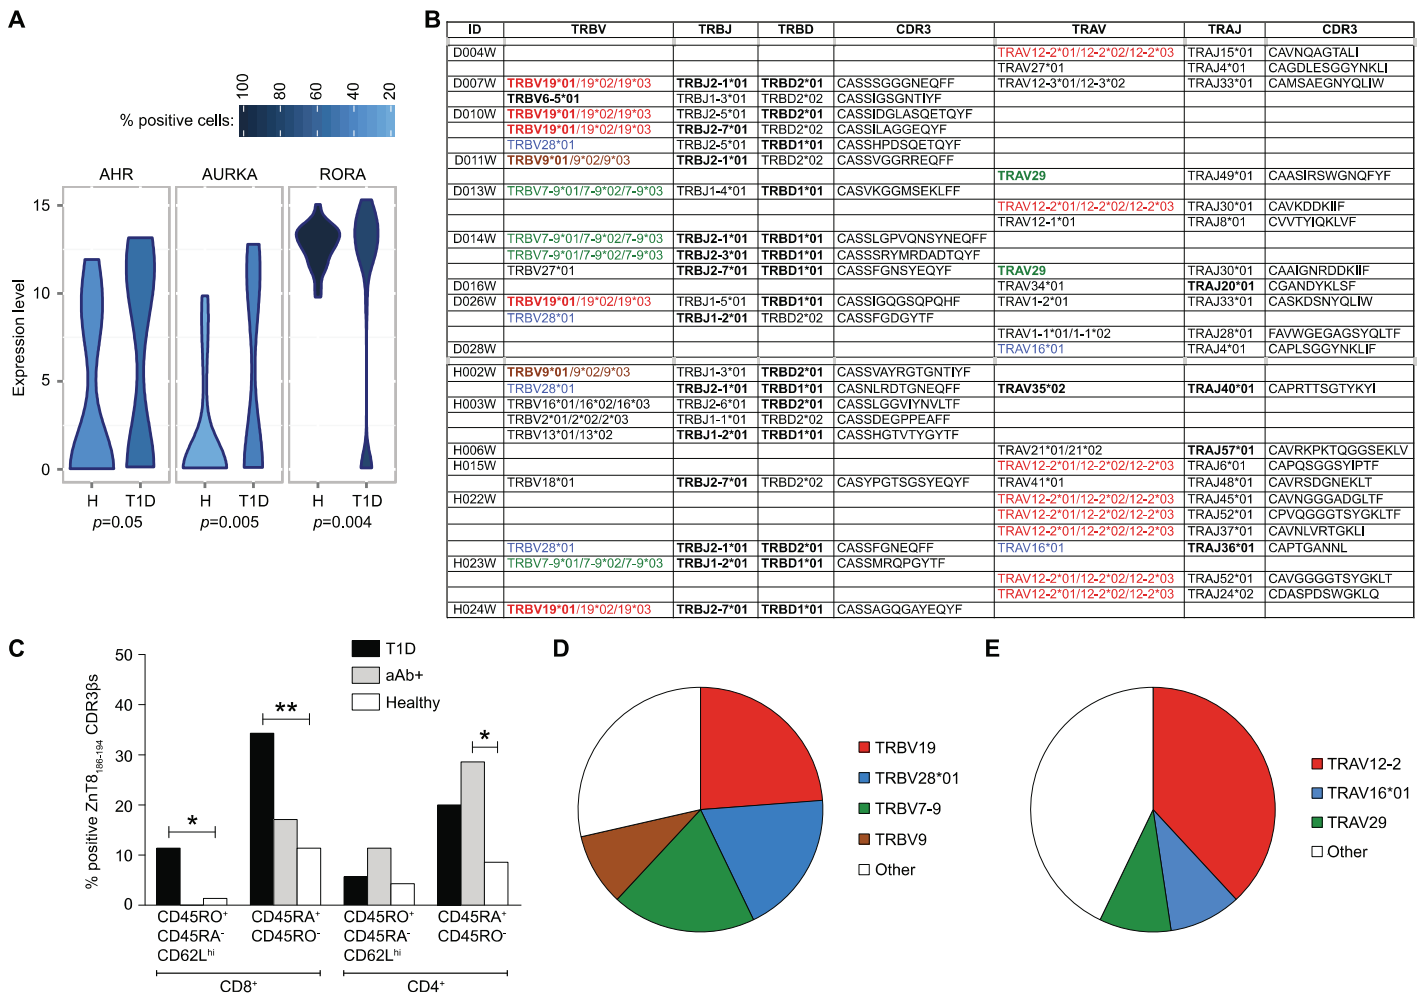

**Fig. S9. Gene expression in *ex-vivo* single-sorted ZnT8<sub>186-194</sub> MMr<sup>+</sup>CD8<sup>+</sup> T cells.** (A) Genes differentially expressed in individual ZnT8<sub>186-194</sub> MMr<sup>+</sup>CD8<sup>+</sup> T cells from T1D and healthy subjects. Single cells were sorted into empty PCR wells. cDNA synthesized with a Superscript VILO RT Kit (Invitrogen) was preamplified for 16 cycles with TATAA GrandMaster Mix and 61 primer pairs (Table S6) as follows: 1x [95°C 8 min], 16x [95°C 45 sec, 49°C 1 min (with 0.3°C increment/cycle), 72°C 1.5 min], 1x [72°C 7 min]. RT-PCR was carried out on a Fluidigm BioMark HD with the 96.96 Dynamic Array IFC, the GE 96x96 Fast PCR+ Melt protocol and SsoFast EvaGreen Supermix with Low ROX (Biorad), with 5 μM primers per assay. Data were analyzed using Fluidigm Real-Time PCR software followed by KNIME 2.5.2 and R 3.2.2 (www.r-project.org). Pre-processing *via* a linear model to correct for confounding effects was performed as described (43). The semi-continuous Hurdle model was subsequently applied to account for bimodal gene expression in single cells, allowing assessment of differential expression with respect to both the frequency of expression and the positive expression means *via* a likelihood ratio test. Violin plots display the density of expression (max.Ct–Ct) of genes that differ significantly between T1D and healthy donors (n=32 and n=25 ZnT8<sub>186-194</sub> MMr<sup>+</sup>CD8<sup>+</sup> T cells from 11 and 6 individuals, respectively). Blue shading illustrates the proportion of positive cells. *p* values were calculated with the Hurdle model. (B) *TRB* and *TRA* gene usage and the corresponding CDR3 aminoacid sequences of single-sorted cells from T1D (top, D-coded IDs) and healthy donors (bottom, H-coded IDs). Each line corresponds to an individual T cell. *TRBV* and *TRAV* genes shared with ZnT8<sub>186-194</sub>-reactive clones obtained from separate subjects are shown in bold; repeatedly used genes are shown in color. (C) Prevalence of the CDR3β aminoacid sequences obtained from single-sorted cells among HLA-A2<sup>+</sup> T1D (n=5), aAb<sup>+</sup> (n=5) and healthy subjects (n=10), as assessed by *in-silico* analysis of CDRβ repertoires obtained from the indicated CD8<sup>+</sup> and CD4<sup>+</sup> T-cell subsets. \**p*≤0.04, \*\**p*=0.008 by Fisher's exact test. (D-E) Distribution of *TRBV* (D) and *TRAV* (E) gene usage among ZnT8<sub>186-194</sub> MMr<sup>+</sup>CD8<sup>+</sup> T cells. Color codes are matched to panel B.



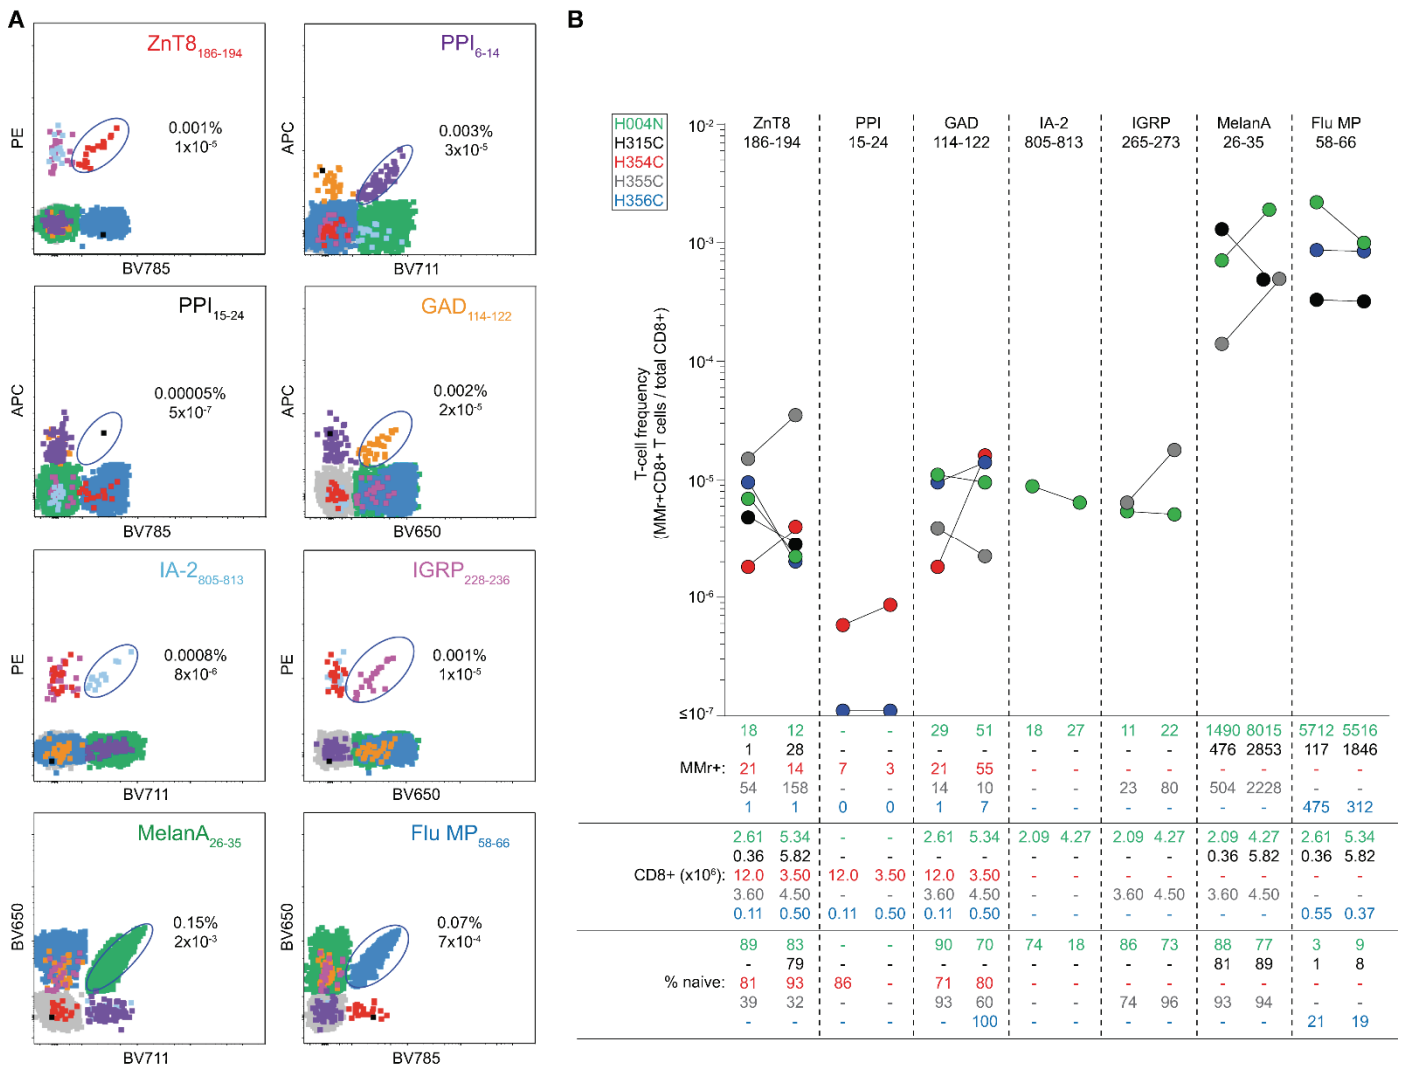

**Fig. S10. Extended combinatorial MMr panel for the analysis of multiple islet-reactive CD8<sup>+</sup> T-cell populations, and reproducibility of *ex-vivo* MMr assays. (A)** After magnetic depletion of CD8<sup>-</sup> cells, PBMCs were sequentially gated as depicted in Fig. S7 and the indicated MMr<sup>+</sup> populations were visualized using the gating strategy previously detailed for combinatorial MMr staining (9) and the FlowJo v10 software. The staining panel also included Live/Dead Aqua, anti-CD3-APC-H7 (clone SK7, BD), anti-CD8-PE-Cy7 (clone SK1, eBioscience), anti-CD45RA-FITC (clone HI100, eBioscience) and anti-CCR7-BV421 (clone 150503, BD). The final readout obtained for T1D patient D322D after gating out events positive for <2 or >2 MMr fluorochromes is shown, with events corresponding to each epitope-reactive population depicted in different colors within each plot, and MMr<sup>-</sup> events depicted in grey. **(B)** Reproducibility between the 3-MMr panel depicted in Fig. S7 and the extended 8-MMr panel presented here. Separate blood draws from 5 subjects (H004N, green; H315C, black; H354C, red; H355C, grey; H356C, blue) were analyzed with both panels and the frequency counts were compared. The corresponding MMr<sup>+</sup> and total CD8<sup>+</sup> T-cell counts (x10<sup>6</sup>) are indicated with the same color code below each distribution, together with the percentage of naïve (CD45RA<sup>+</sup>CCR7<sup>+</sup>) cells in each MMr<sup>+</sup> fraction (for fractions ≥5 MMr<sup>+</sup> cells).

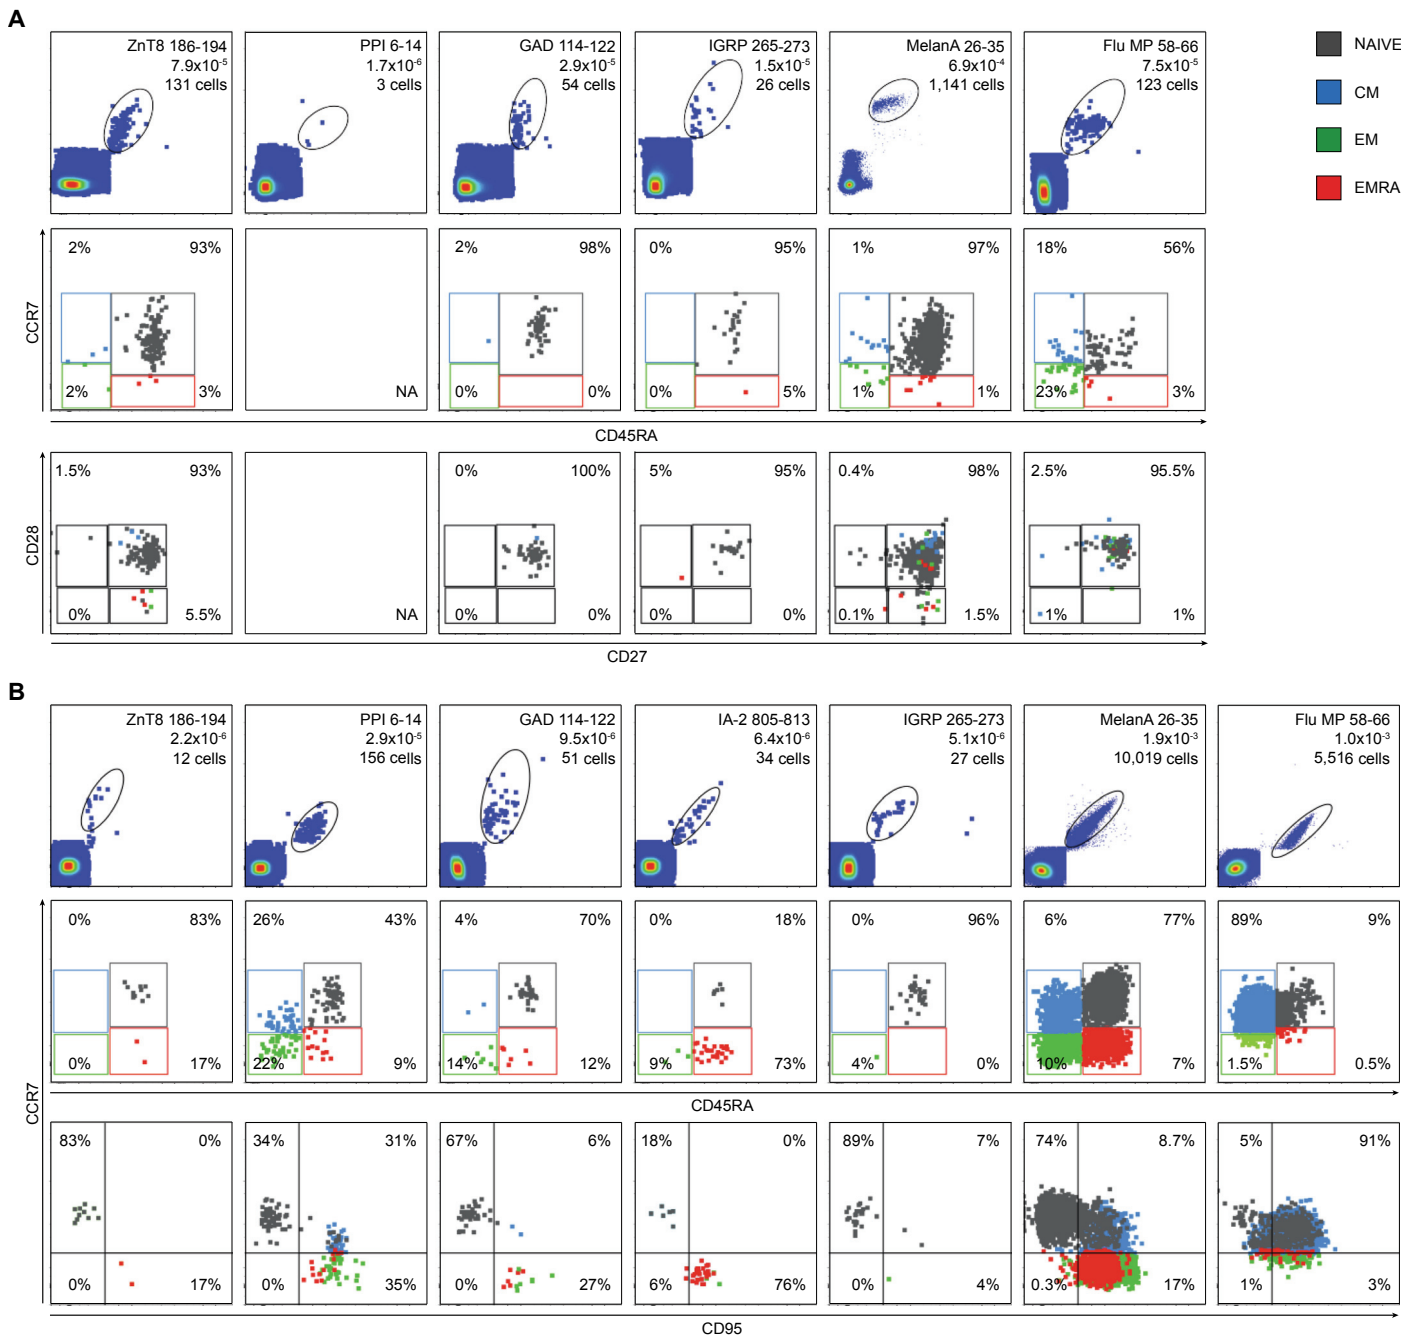

**Fig. S11. CD27, CD28 and CD95 expression on ZnT8<sub>186-194</sub>-reactive CD8<sup>+</sup> T cells. (A)** Representative CD27/CD28 staining of MMr<sup>+</sup>CD8<sup>+</sup> T cells from subject H372C. The first row depicts the fraction of MMr<sup>+</sup> cells for each of the indicated epitopes. The corresponding frequency out of the total  $1.7 \times 10^6$  CD8<sup>+</sup> T cells acquired and the number of MMr<sup>+</sup> events counted are indicated. The second row shows the percent distribution of naïve (CD45RA<sup>+</sup>CCR7<sup>+</sup>; grey), central memory (CM, CD45RA<sup>-</sup>CCR7<sup>+</sup>; blue), effector memory (EM, CD45RA<sup>-</sup>CCR7<sup>-</sup>; green) and terminally differentiated EM CD45RA<sup>+</sup> cells (EMRA, CD45RA<sup>+</sup>CCR7<sup>-</sup>; red) within each MMr<sup>+</sup> fraction. The third row depicts CD27 (AlexaFluor700-labeled clone O323, eBioscience) and CD28 expression (BV421-labeled clone CD28.2, BioLegend) within each of these subsets, using the same color code, with total percent cells indicated in each quadrant. NA, not available (<5 MMr<sup>+</sup> events counted). **(B)** Representative CD95 staining (PE/CF594-labeled clone DX2, BD) for MMr<sup>+</sup>CD8<sup>+</sup> T cells from subject H004N. A total of  $5.3 \times 10^6$  CD8<sup>+</sup> T cells was acquired, and data are represented as in panel A. Results are representative of 4 subjects tested.

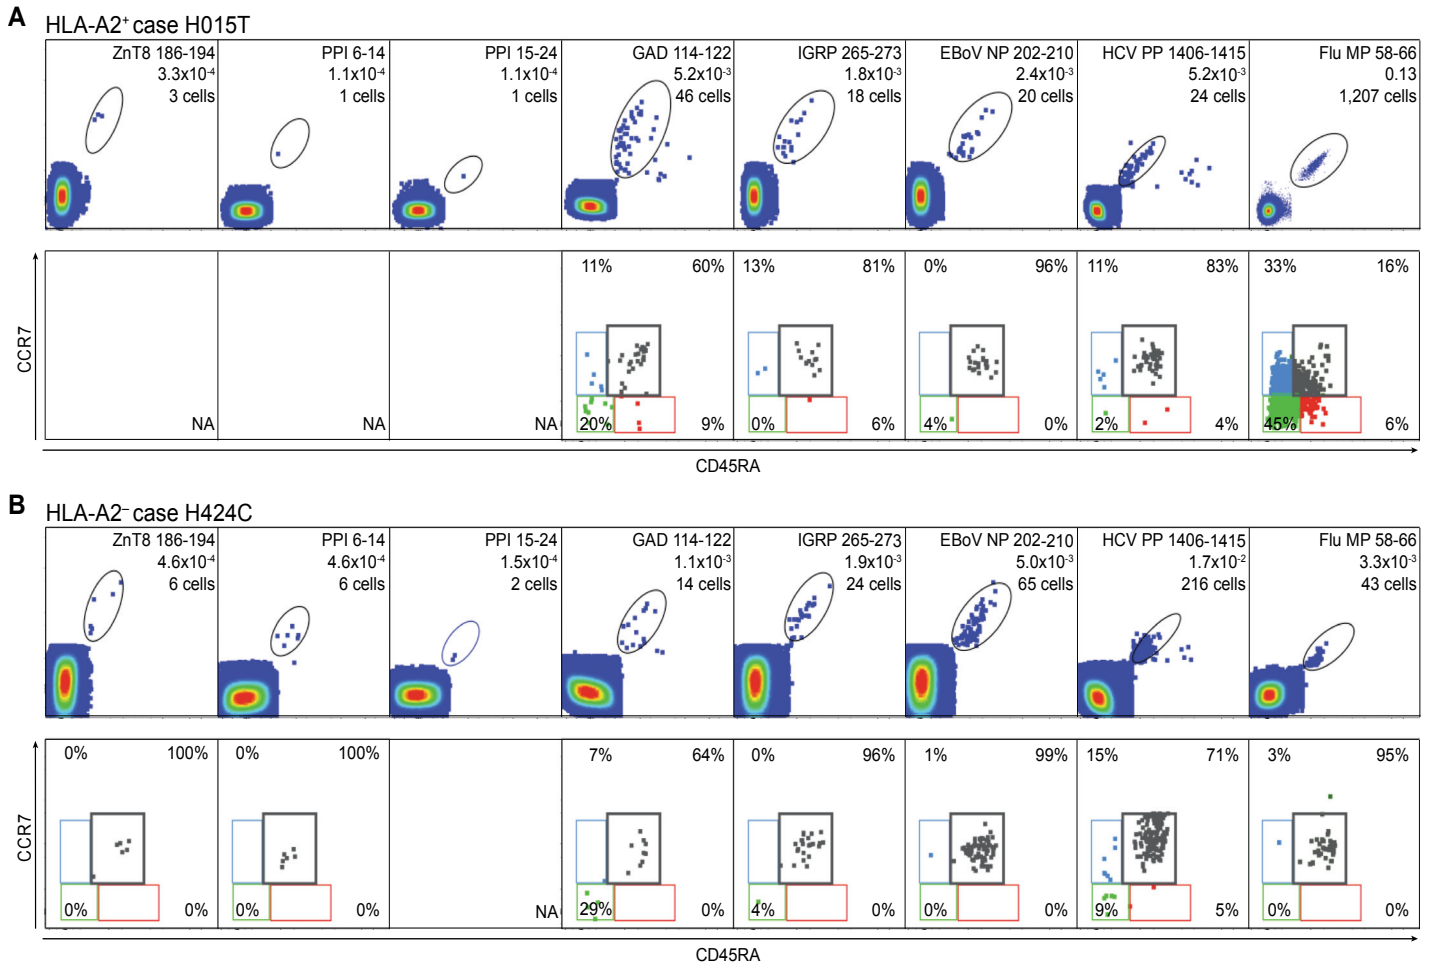

**Fig. S12. Representative MMr and CD45RA/CCR7 dot plots for HLA-A2<sup>+</sup> and HLA-A2<sup>-</sup> healthy donors depicted in Fig. 6F-G.** (A) MMr (top row) and CD45RA/CCR7 staining (bottom row) for each of the indicated epitopes for HLA-A2<sup>+</sup> case H015T. The corresponding frequency out of the total  $0.9 \times 10^6$  CD8<sup>+</sup> T cells acquired and the number of MMr<sup>+</sup> events counted are indicated in the top row. The second row shows the percent distribution of naïve (CD45RA<sup>+</sup>CCR7<sup>+</sup>; grey), central memory (CD45RA<sup>-</sup>CCR7<sup>+</sup>; blue), effector memory (CD45RA<sup>-</sup>CCR7<sup>-</sup>; green) and terminally differentiated EM CD45RA<sup>+</sup> cells (CD45RA<sup>+</sup>CCR7<sup>-</sup>; red) within each MMr<sup>+</sup> fraction, with percent cells indicated in each quadrant. NA, not available (<5 MMr<sup>+</sup> events counted). (B) The same representation is shown for HLA-A2<sup>-</sup> case H424C. A total of  $1.3 \times 10^6$  CD8<sup>+</sup> T cells was acquired.

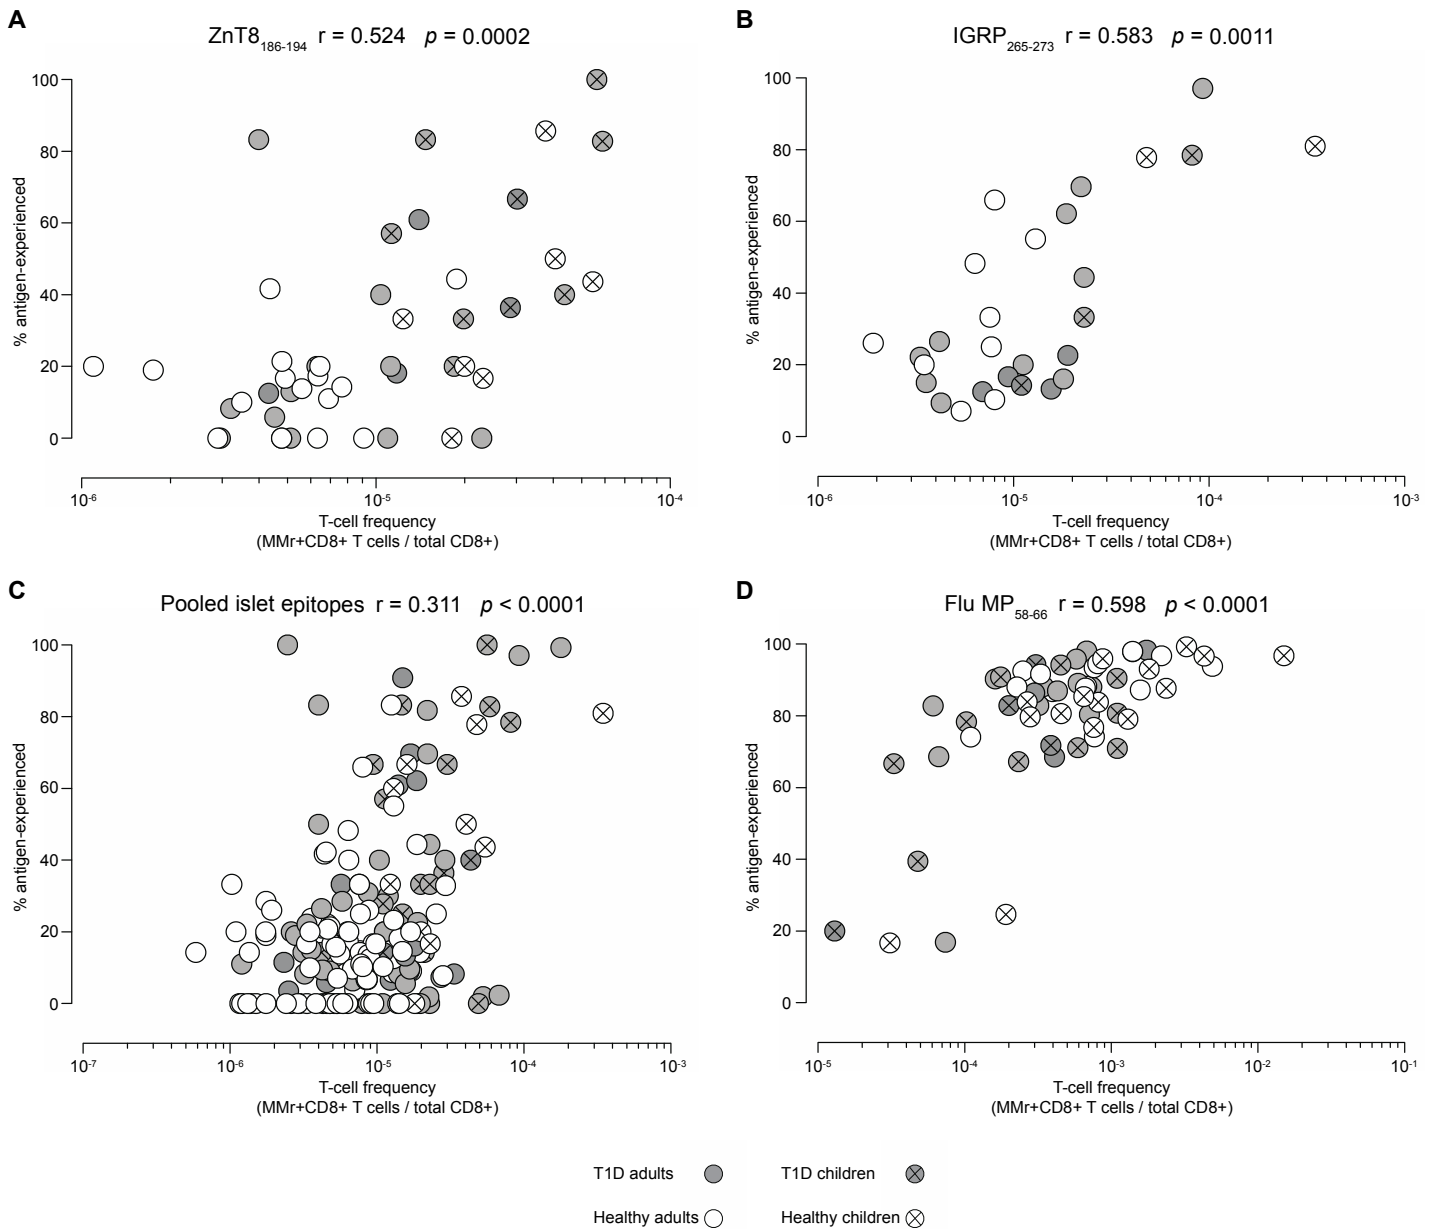

**Fig. S13. Correlation between the frequency of MMr<sup>+</sup>CD8<sup>+</sup> T cells and the Ag-experienced fraction within the same MMr<sup>+</sup>CD8<sup>+</sup> population.** (A) Correlation for ZnT8<sub>186-194</sub> MMr<sup>+</sup>CD8<sup>+</sup> T cells. (B) Correlation for IGRP<sub>265-273</sub> MMr<sup>+</sup>CD8<sup>+</sup> T cells. (C) Correlation for pooled MMr<sup>+</sup>CD8<sup>+</sup> T cells recognizing all islet epitopes analyzed (ZnT8<sub>186-194</sub>, PPI<sub>6-14</sub>, PPI<sub>15-24</sub>, GAD<sub>114-122</sub>, IA-2<sub>805-813</sub>, IGRP<sub>265-273</sub>). (D) Correlation for Flu MP<sub>58-66</sub> MMr<sup>+</sup>CD8<sup>+</sup> T cells. Graphs were obtained by compiling data presented in Fig. 5 for T1D patients (adults, grey circles; children, crossed grey circles) and age/sex-matched healthy donors (adults, white circles; children, crossed white circles). Values obtained by Spearman correlation analysis are shown for each graph.

| Status | Donor | Age (yrs) | Gender (M/F) | T1D duration (days) | GADA | IA-2A | ZnT8A | Therapy | Sort strategy | Sorted wells | Growing wells | ZnT8 MMr+ wells | Cloning efficiency | Clones | Source cell                           |
|--------|-------|-----------|--------------|---------------------|------|-------|-------|---------|---------------|--------------|---------------|-----------------|--------------------|--------|---------------------------------------|
| T1D    | D222D | 60        | M            | 3                   | +    | -     | +     | Insulin | In vitro      | 100          | 5             | 3               | 3%                 | (1)    | ND                                    |
|        |       |           |              |                     |      |       |       |         |               |              |               |                 |                    | 2      | ND                                    |
|        |       |           |              |                     |      |       |       |         |               |              |               |                 |                    | 3      | ND                                    |
| T1D    | D010R | 12        | M            | 8                   | -    | +     | -     | Insulin | Ex vivo       | 50           | 10            | 2               | 4%                 | 1D3    | CD45RA <sup>+</sup> CCR7 <sup>-</sup> |
|        |       |           |              |                     |      |       |       |         |               |              |               |                 |                    | (1E2)  | CD45RA <sup>+</sup> CCR7 <sup>-</sup> |
| T1D    | D349V | 62        | F            | 6                   | +    | +     | +     | Insulin | Ex vivo       | 67           | 1             | 1               | 1%                 | 178B9  | CD45RA <sup>+</sup> CCR7 <sup>-</sup> |
| T1D    | D267T | 25        | F            | 12                  | +    | ND    | -     | Insulin | Ex vivo       | 50           | 7             | 1               | 2%                 | 33B8   | CD45RA <sup>+</sup> CCR7 <sup>-</sup> |
| T1D    | D351D | 32        | M            | 57                  | +    | -     | -     | Insulin | Ex vivo       | 132          | 6             | 3               | 2%                 | 188C3  | CD45RA <sup>+</sup> CCR7 <sup>-</sup> |
|        |       |           |              |                     |      |       |       |         |               |              |               |                 |                    | 188D3  | CD45RA <sup>+</sup> CCR7 <sup>-</sup> |
| H      | H017N | 34        | F            | NA                  | -    | -     | -     | None    | In vitro      | 80           | 8             | 1               | 1%                 | A1     | ND                                    |
| H      | H314C | 24        | M            | NA                  | -    | -     | ND    | None    | Ex vivo       | 60           | 2             | 1               | 2%                 | 6C4    | CD45RA <sup>+</sup> CCR7 <sup>-</sup> |
| H      | H328C | 29        | M            | NA                  | -    | -     | ND    | None    | Ex vivo       | 45           | 12            | 0               | 0%                 | NA     | NA                                    |
|        |       |           |              |                     |      |       |       |         | In vitro      | 119          | 26            | 3               | 2%                 | 8E8    | ND                                    |
|        |       |           |              |                     |      |       |       |         |               |              |               |                 |                    | 9C8    | ND                                    |
|        |       |           |              |                     |      |       |       |         |               |              |               |                 |                    | 9B3    | ND                                    |
| H      | H079O | 35        | F            | NA                  | -    | -     | -     | None    | Ex vivo       | 260          | 7             | 1               | 0.4%               | 42D8   | CD45RA <sup>+</sup> CCR7 <sup>-</sup> |
| H      | H034O | 43        | F            | NA                  | -    | -     | -     | None    | Ex vivo       | 80           | 1             | 1               | 1%                 | 141B9  | ND                                    |

**Table S1. Summary of ZnT8<sub>186-194</sub>-reactive CD8<sup>+</sup> T-cell clones.** Clones in parentheses could not be stabilized in long-term cultures and underwent more limited characterization. For those clones obtained after *ex-vivo* index sorting of ZnT8<sub>186-194</sub> MMr<sup>+</sup> cells, the surface phenotype of the source cell is indicated in the last column. NA, not applicable; ND, not determined; GADA, GAD aAbs; IA-2A, IA-2 aAbs; ZnT8A, ZnT8 aAbs.

| Study group    | Case ID      | Age (years) | Gender (M/F) | T1D duration (Months) | HLA-A*02 status | IAA | GADA | IA-2A | ZnT8A | Therapy |
|----------------|--------------|-------------|--------------|-----------------------|-----------------|-----|------|-------|-------|---------|
| T1D (n=10)     | jdrfT1D1     | 21          | M            | 3.6                   | -               | +   | +    | +     | +     | Insulin |
|                | jdrfT1D2     | 38          | M            | 17.7                  | -               | +   | +    | +     | +     | Insulin |
|                | jdrfT1D3     | 50          | F            | 34.6                  | -               | +   | +    | -     | -     | Insulin |
|                | sbirT1D3     | 25          | M            | 25.7                  | -               | +   | -    | +     | -     | Insulin |
|                | sbirT1D4     | 44          | M            | 10.2                  | -               | -   | -    | -     | -     | Insulin |
|                | sbirT1D5     | 16          | M            | 17.2                  | +               | -   | -    | -     | -     | Insulin |
|                | sbirT1D6     | 20          | F            | 15.4                  | +               | +   | +    | -     | -     | Insulin |
|                | sbirT1D7     | 25          | F            | 10.7                  | +               | -   | +    | +     | +     | Insulin |
|                | sbirT1D8     | 41          | M            | 8.3                   | +               | -   | +    | -     | -     | Insulin |
|                | sbirT1D9     | 17          | M            | 8.3                   | +               | +   | +    | -     | -     | Insulin |
| At-risk (n=7)  | jdrfAB+ 2    | 44          | F            | NA                    | +               | +   | -    | -     | -     | None    |
|                | jdrfAB+ 3    | 59          | M            | NA                    | -               | +   | +    | -     | -     | None    |
|                | jdrfAB+ 4    | 29          | M            | NA                    | +               | -   | +    | +     | -     | None    |
|                | jdrfAB+ 5    | 49          | F            | NA                    | +               | -   | +    | +     | -     | None    |
|                | jdrfAB+ 6    | 53          | M            | NA                    | +               | -   | +    | +     | +     | None    |
|                | jdrfAB+ 7    | 32          | F            | NA                    | -               | -   | +    | -     | -     | None    |
|                | jdrfAB+ 9    | 17          | F            | NA                    | +               | -   | +    | +     | +     | None    |
| Healthy (n=12) | control1     | 24          | F            | NA                    | +               | -   | -    | -     | -     | None    |
|                | control2     | 38          | F            | NA                    | -               | -   | -    | -     | -     | None    |
|                | control3     | 22          | F            | NA                    | +               | -   | -    | -     | -     | None    |
|                | sbirControl1 | 27          | F            | NA                    | +               | -   | -    | -     | -     | None    |
|                | sbirControl3 | 22          | M            | NA                    | +               | -   | -    | -     | -     | None    |
|                | sbirControl4 | 27          | M            | NA                    | +               | -   | -    | -     | -     | None    |
|                | sbirControl5 | 25          | F            | NA                    | +               | -   | -    | -     | -     | None    |
|                | sbirControl6 | 40          | M            | NA                    | +               | -   | -    | -     | -     | None    |
|                | sbirControl7 | 33          | M            | NA                    | -               | -   | -    | -     | -     | None    |
|                | sbirControl8 | 37          | M            | NA                    | +               | -   | -    | -     | -     | None    |
| sbirControl9   | 21           | M           | NA           | +                     | -               | -   | -    | -     | None  |         |
| sbirControl10  | 35           | M           | NA           | +                     | -               | -   | -    | -     | None  |         |

**Table S2. Characteristics of study subjects for *in-silico* TRB analyses.** IAA, insulin aAbs; NA, not applicable.



| Case ID    | Age (yrs) | Gender (M/F) | HLA-A/B                                  | Predicted HLA binding affinity (nM) |                               |                                  |                                  |                               |                               |                                |                                 |
|------------|-----------|--------------|------------------------------------------|-------------------------------------|-------------------------------|----------------------------------|----------------------------------|-------------------------------|-------------------------------|--------------------------------|---------------------------------|
|            |           |              |                                          | ZnT8<br>186-194                     | PPI<br>6-14                   | PPI<br>15-24                     | GAD<br>114-122                   | IGRP<br>265-273               | EboV NP<br>202-210            | HCV PP<br>1406-1415            | Flu MP<br>58-66                 |
| H015T<br>▽ | 32        | M            | A*02:01<br>NA<br>NA<br>NA                | 355<br>—<br>—<br>—                  | 13<br>—<br>—<br>—             | 234<br>—<br>—<br>—               | 23<br>—<br>—<br>—                | 16<br>—<br>—<br>—             | 10<br>—<br>—<br>—             | 41<br>—<br>—<br>—              | 16<br>—<br>—<br>—               |
| H311C<br>○ | 33        | M            | A*02:01<br>A*01:01<br>B*15:01<br>B*44:02 | 355<br>14759<br>10716<br>25029      | 13<br>19182<br>2679<br>17913  | 234<br>33558<br>6813<br>25941    | 23<br>7213<br>4816<br>18087      | 16<br>19192<br>1290<br>18349  | 10<br>16505<br>2288<br>14949  | 41<br>26256<br>2251<br>27487   | 16<br>22016<br>12092<br>24697   |
| H314C<br>◇ | 24        | M            | A*02:01<br>A*68:01<br>B*07:02<br>B*44:02 | 355<br>15512<br>7498<br>25029       | 13<br>29930<br>7405<br>17913  | 234<br>43713<br>17414<br>25941   | 23<br>31674<br>28460<br>18087    | 16<br>22468<br>11781<br>18349 | 10<br>26846<br>3812<br>14949  | 41<br>35191<br>6075<br>27487   | 16<br>22471<br>16630<br>24697   |
| H356C<br>□ | 28        | M            | A*02:01<br>A*01:01<br>B*08:01<br>B*49:01 | 355<br>14759<br>12180<br>NA         | 13<br>19182<br>5071<br>NA     | 234<br>33558<br>31975<br>NA      | 23<br>7213<br>15488<br>NA        | 16<br>19192<br>14954<br>NA    | 10<br>16505<br>4951<br>NA     | 41<br>26256<br>17633<br>NA     | 16<br>22016<br>11752<br>NA      |
| H372C<br>△ | 24        | F            | A*02:01<br>A*26:01<br>B*18:01<br>B*44:02 | 355<br>21758<br>21582<br>25029      | 13<br>23637<br>17880<br>17913 | 234<br>36297<br>39939<br>25941   | 23<br>23966<br>23844<br>18087    | 16<br>20711<br>13228<br>18349 | 10<br>23427<br>21410<br>14949 | 41<br>26585<br>33037<br>27487  | 16<br>19347<br>19695<br>24697   |
| H018N<br>▽ | 35        | F            | A*02:05<br>A*30:02<br>B*18:01<br>B*50:01 | NA<br>10619<br>21582<br>NA          | NA<br>2111<br>17880<br>NA     | NA<br>12271<br>39939<br>NA       | NA<br>2619<br>23844<br>NA        | NA<br>5559<br>13228<br>NA     | NA<br>1870<br>21410<br>NA     | NA<br>9148<br>33037<br>NA      | NA<br>11631<br>19695<br>NA      |
| H279S<br>■ | 33        | M            | A*01:01<br>A*66:01<br>B*08:01<br>B*41:02 | 14759<br>9110<br>12180<br>NA        | 19182<br>11692<br>5071<br>NA  | 33558<br>39995<br>31975<br>NA    | 7213<br>18633<br>15488<br>NA     | 19192<br>9799<br>14954<br>NA  | 16505<br>10023<br>4951<br>NA  | 26256<br>37091<br>17633<br>NA  | 22016<br>8751<br>11752<br>NA    |
| H355C<br>● | 34        | M            | A*03:01<br>A*24:02<br>B*07:02<br>B*35:02 | 18409<br>12287<br>7498<br>NA        | 4379<br>1678<br>7405<br>NA    | 15490<br>34034<br>17414<br>NA    | 11720<br>18766<br>28460<br>NA    | 6945<br>3617<br>11781<br>NA   | 1985<br>41<br>3812<br>NA      | 9370<br>36129<br>6075<br>NA    | 15303<br>7558<br>16630<br>NA    |
| H423C<br>◇ | 24        | M            | A*03:01<br>A*23:01<br>B*07:02<br>B*15:01 | 18409<br>11384<br>7498<br>10716     | 4379<br>968<br>7405<br>2679   | 15490<br>36359<br>17414<br>6813  | 11720<br>17176<br>28460<br>4816  | 6945<br>5503<br>11781<br>1290 | 1985<br>100<br>3812<br>2288   | 9370<br>32936<br>6075<br>2251  | 15303<br>6184<br>16630<br>12092 |
| H424C<br>▲ | 28        | F            | A*32:01<br>A*32:01<br>B*44:02<br>B*44:02 | 2093<br>2093<br>25029<br>25029      | 727<br>727<br>17913<br>17913  | 35528<br>35528<br>25941<br>25941 | 11017<br>11017<br>18087<br>18087 | 32<br>32<br>18349<br>18349    | 12<br>12<br>14949<br>14949    | 9322<br>9322<br>27487<br>27487 | 82<br>82<br>24697<br>24697      |

**Table S4. Characteristics of HLA-A2<sup>+</sup> and HLA-A2<sup>-</sup> healthy donors for *ex-vivo* MMr studies.** Predicted HLA Class I peptide binding affinities were calculated using NetMHC 4.0 (<http://www.cbs.dtu.dk/services/NetMHC/>). HLA-A2 (A\*02:01) and predicted affinity values compatible with peptide binding to the indicated HLA allotypes are highlighted in red. NA, not available.



|                    | nPOD case | Sex | Age (yrs) | T1D T2D (yrs) | Positive aAbs      | C-peptide (ng/ml) | ZnT8 MMr <sup>+</sup> |      | MelanA MMr <sup>+</sup> |     | CDR3β <sup>+</sup> |
|--------------------|-----------|-----|-----------|---------------|--------------------|-------------------|-----------------------|------|-------------------------|-----|--------------------|
|                    |           |     |           |               |                    |                   | Pa                    | PLN  | Pa                      | PLN | PLN                |
| T1D (n=9)          | 6070      | F   | 23        | 7             | IA-2/mIAA          | <0.05             | 74                    | 0    | 0                       | NA  | NA                 |
|                    | 6161      | F   | 19        | 7             | IA-2/mIAA          | <0.05             | 124                   | 1176 | 0                       | 0   | 8-18-0             |
|                    | 6211      | F   | 24        | 4             | GAD/IA-2/ZnT8/mIAA | <0.05             | 30                    | 60   | 0                       | 54  | 0-0-0              |
|                    | 6212      | M   | 20        | 5             | mIAA               | <0.05             | 0                     | 0    | NA                      | NA  | 14-0-0             |
|                    | 6237      | F   | 18        | 12            | GAD/mIAA           | <0.05             | 267                   | 0    | 0                       | NA  | NA                 |
|                    | 6242      | M   | 39        | 19            | IA-2/mIAA          | <0.05             | 66                    | 101  | 0                       | 0   | 0-0-5              |
|                    | 6243      | M   | 13        | 5             | mIAA               | 0.42              | 0                     | 209  | NA                      | 0   | 0-0-0              |
|                    | 6258      | F   | 39        | 37            | mIAA               | <0.05             | 118                   | 299  | 0                       | 0   | NA                 |
|                    | 6325      | F   | 20        | 6             | GAD/IA-2           | 0.14              | 28                    | 0    | 0                       | 0   | NA                 |
| aAb+ (n=9)         | 6080      | F   | 69        | NA            | GAD/mIAA           | 1.84              | 55                    | 50   | 25                      | 61  | NA                 |
|                    | 6101      | M   | 65        | NA            | GAD                | 26.18             | 0                     | 0    | NA                      | NA  | NA                 |
|                    | 6123      | F   | 23        | NA            | GAD                | 2.01              | 0                     | 0    | NA                      | NA  | NA                 |
|                    | 6151      | M   | 30        | NA            | GAD                | 5.49              | 28                    | NA   | 0                       | NA  | NA                 |
|                    | 6154      | F   | 49        | NA            | GAD                | <0.05             | 64                    | NA   | 0                       | NA  | NA                 |
|                    | 6171      | F   | 4         | NA            | GAD                | 8.95              | 37                    | 0    | 0                       | NA  | NA                 |
|                    | 6347      | M   | 9         | NA            | mIAA               | 3.26              | 33                    | 60   | 0                       | 191 | NA                 |
|                    | 6388      | F   | 25        | NA            | GAD/mIAA           | 1.38              | 34                    | 35   | 0                       | 0   | NA                 |
|                    | 6397      | F   | 21        | NA            | GAD                | 12.8              | 42                    | 189  | 0                       | 0   | NA                 |
| No diabetes (n=11) | 6103      | M   | 2         | NA            | —                  | 0.98              | 55                    | 0    | 0                       | NA  | NA                 |
|                    | 6179      | F   | 20        | NA            | —                  | 2.74              | 96                    | 150  | 0                       | 0   | NA                 |
|                    | 6182      | M   | 3         | NA            | —                  | 2.28              | 23                    | 163  | 0                       | 65  | NA                 |
|                    | 6227      | F   | 17        | NA            | —                  | 2.75              | 3                     | 0    | 0                       | NA  | NA                 |
|                    | 6234      | F   | 20        | NA            | —                  | 6.89              | 6                     | 0    | 0                       | NA  | NA                 |
|                    | 6254      | M   | 38        | NA            | —                  | 6.43              | 0                     | 0    | NA                      | NA  | 0-4-0              |
|                    | 6271      | M   | 17        | NA            | —                  | 11.47             | 0                     | 0    | NA                      | 0   | 0-0-0              |
|                    | 6287      | F   | 57        | NA            | —                  | 4.75              | 4                     | 0    | 0                       | NA  | 9-0-0              |
|                    | 6289      | M   | 19        | NA            | —                  | 8.05              | 0                     | 0    | NA                      | NA  | 0-0-0              |
|                    | 6357      | M   | 5         | NA            | —                  | 8.82              | 0                     | 0    | NA                      | NA  | NA                 |
|                    | 6366      | F   | 21        | NA            | —                  | 0.41              | 0                     | 0    | NA                      | NA  | NA                 |
| T2D (n=3)          | 6028      | M   | 33        | 17            | —                  | 22.40             | 0                     | 0    | NA                      | NA  | NA                 |
|                    | 6059      | F   | 19        | 0.3           | —                  | 10.68             | 0                     | 107  | NA                      | 0   | NA                 |
|                    | 6275      | M   | 48        | 2             | —                  | 3.46              | 0                     | 0    | NA                      | NA  | 0-2-0              |
| Other              | 6288      | M   | 55        | NA            | —                  | 12.96             | 211                   | 87   | 0                       | 0   | 250-0-0            |

**Table S5. Characteristics of nPOD cases for *in-situ* ZnT8<sub>186-194</sub> MMr staining.** The clinical characteristics of each case are reported along with the counts ( $\times 10^{-3}$ ) of ZnT8<sub>186-194</sub> and MelanA<sub>26-35</sub> MMr<sup>+</sup> cells/mm<sup>2</sup> pancreas (Pa) and PLN section area. Positive sections are marked in red. In several cases, the PLN CD8<sup>+</sup> T-cell repertoire was interrogated *in-silico* for the presence of immunodominant CDR3β aminoacid sequences retrieved from 3 ZnT8<sub>186-194</sub>-reactive CD8<sup>+</sup> T-cell clones (Fig. 4D). The results of this *in-silico* search are reported in the last column, with numbers indicating the frequency of the 3 selected sequences (D010R 1E2, H034O 141B9 and H328C 8E8, respectively) per 10<sup>6</sup> TCRs, and positive counts indicated in red. Case #6287 (presenting a circumscribed neuroendocrine tumor in the pancreatic pan-

body region; pan-tail region analyzed here) was classified as a non-diabetic control, while non-diabetic case #6288 was classified as 'other' based on a history of non-alcoholic cirrhosis and histological findings of chronic pancreatitis. NA, not applicable or not available; mIAA, micro-insulin aAbs.

| Preamplification | qPCR                   | qPCR           | Preamplification       | qPCR         | qPCR                  |
|------------------|------------------------|----------------|------------------------|--------------|-----------------------|
| INfg-1_3'        | TGGATGCTGTGTCATCTT     | INfg-1_3'      | TGGATGCTGTGTCATCTT     | Bcl6-1-3'    | AAGTCCAGGAGGATGACAGAA |
| INfg-1_5'        | CTGTACTGCCAGGACCAT     | INfg-2_5'      | GGTCACTCAGATGTAGCGGA   | Bcl6-2-5'    | AGCCGTGAGCAGTTAGAGC   |
| IL4_1_3'         | CTCTGGTGGCTTCTTCAC     | IL4_1_3'       | CTCTGGTGGCTTCTTCAC     | CD4-1-3'     | CATTCAGCTTGGATGGACCT  |
| IL4_1-5'         | TGCCCTCAAGAACACAACG    | IL4_1-5'       | GGCAGTTTACACAGCCACT    | CD4-1-5'     | ACCGGGGAGTCCCTTTTAG   |
| IL10n2-1-3'      | GCCTTGCTCTGTTTTCACAG   | IL10n2-1-3'    | GCCTTGCTCTGTTTTCACAG   | IL2_3-3'     | GCACCTCTCCAGAGTTTG    |
| IL10n2-1-5'      | TGCTGGAGGACTTAAAGGGTTA | IL10n2-2-5'    | TTTAAAGGGTTACTGGGTTGC  | IL2_3-5'     | TGGAGCATTTACTGCTGGATT |
| IL-13-1-3'       | TTTACAAACTGGGCCACCTC   | IL-13-1-3'     | TTTACAAACTGGGCCACCTC   | CD8-3-5'     | GCTGGACTTCGCTGTGATAT  |
| IL-13-1-5'       | GGTCAACATCACCCAGAACC   | IL-13-2-5'     | GTACTGTGACGGCCCTGGAAT  | CD8-4-3'     | TTGTCTCCGATTTGACCAC   |
| II17f-1-3'       | ATGCAGCCCAAGTTCCTACA   | II17f-1-3'     | ATGCAGCCCAAGTTCCTACA   | CD52-1-3'    | CTGAAGCAGAAAGAGTGGATT |
| II17f-1-5'       | TCCAAAAGCCTGAGAGTTGC   | II17f-2-5'     | GCCTGTGCCAGGAGGTAGTA   | CD52-1-5'    | GGCCTCTCTCTCTCTACT    |
| FOXp3n1-3'       | GCCTGTGAACCAAGTGGTAGAT | FOXp3n1-3'     | GCCTGTGAACCAAGTGGTAGAT | RANTES-1-5'  | CGCTGTCACTCTCAITGCTA  |
| FOXp3n1-5'       | GATGCCATGGAACACAGACAT  | FOXp3n2-5'     | ACATTCGCCAGGTTCTCCAC   | RANTES-1-3'  | ACACACTTGGCGGTTCTTTC  |
| SRP14_3'         | GCTGTGCTTTGGTCTTCTT    | SRP14_5-2'     | TACTGTGGAGGGCTTTGAGC   | REL-1-5'     | ACAAATGTGAAGGGCGATCA  |
| SRP14_5'         | TATGACGGTGAACCAAAACC   | SRP14_3'       | GCTGTGCTTTGGTCTTCTT    | REL-1-3'     | CCGCTCTGCGAGTCTTTCC   |
| c-Maf-1-3'       | GCTTCCAAAATGTGGCGTAT   | c-Maf-1-3'     | GCTTCCAAAATGTGGCGTAT   | RGs16-2-5'   | CACGCTTCTGGAAGACAGA   |
| c-Maf-2-5'       | GGACGCGTCAAGGAGAAAT    | c-Maf-2-5'     | GGACGCGTCAAGGAGAAAT    | RGs16-1-3'   | GACCTCTTAAAGGGCCCTCAC |
| Egr2-1-3'        | GTTGAAGCTGGGGAAAGTAC   | Egr2-1-3'      | GTTGAAGCTGGGGAAAGTAC   | EOMES-1-3'   | GGGACAATCTGATGGGATGA  |
| Egr2-2-5'        | TGGAGAGAAAGGCTGTTGG    | Egr2-2-5'      | TGGAGAGAAAGGCTGTTGG    | EOMES-1-5'   | CACAAATACCAACCCGACT   |
| RORnew_3-3'      | TCCCTCTGCTTCTTGACAT    | RORnew_3-3'    | TCCCTCTGCTTCTTGACAT    | CD3e-1-3'    | CCTCATCACCGCTATGTTT   |
| RORnew_4-5'      | TCCCGAGATGCTGCAAGTT    | RORnew_4-5'    | TCCCGAGATGCTGCAAGTT    | CD3e-1-5'    | GCATCACTGGAGAGTCTGG   |
| T-bet-1-3'       | ATTCACCCCAAGGAATGAC    | T-bet-1-3'     | ATTCACCCCAAGGAATGAC    | NFATC2-2-5'  | AAGAAGAGCCGAATGCACATA |
| T-bet-2-5'       | CCGTGACTGCTACCAAGAAT   | T-bet-2-5'     | CCGTGACTGCTACCAAGAAT   | NFATC2-1-3'  | AGAAGCTTCTGCGCCCTCAC  |
| TGFB-1-3'        | CACAACCTCCGGTACATGAAA  | TGFB_5'-Taq-2' | TACCTGAACCCGTTGTTGCTT  | CXCR5-2-5'   | AAATGGACCTCGAAGACCTG  |
| TGFB_5'-Taq-1'   | TACCTGAACCCGTTGTTGCTT  | TGFB_3'-Taq-1' | CAACTCCGGTGACATCAAAA   | CXCR5-1-3'   | CTTGAAGGAGGCGCATGAGG  |
| CD127-1-3'       | CTGCAGGAGTGCACGCTTTG   | CD127-1-3'     | CTGCAGGAGTGCACGCTTTG   | GZMA-2-5'    | GAACAAGGTTCCAGGTCA    |
| CD127-1-5'       | CTGAGGCTCTTTGACCTG     | CD127-1-5'     | CTGAGGCTCTTTGACCTG     | GZMA-1-3'    | TTTTTCTTTTTTCCATCAGC  |
| CTLA-4-1-3'      | GTTGCCATATGCCAGTAT     | CTLA-4-1-3'    | GTTGCCATATGCCAGTAT     | GZMA-1-5'    | GGTGGCTTCTGATACGAGA   |
| CTLA-4-1-5'      | TGCACGCGAGGTGACGAG     | CTLA-4-2-5'    | TGGGGAATGAGTGCACCTC    | GZMB-1-3'    | GCTGCAGTAGCATGATGCG   |
| GITR-3-3'        | TGCAGTGTCCAAAGTTTG     | GITR-3-3'      | TGCAGTGTCCAAAGTTTG     | GZMB-1-5'    | CAGCCATTCCTCTCTGCT    |
| GITR-3-5'        | GAGTGGGACTGCATGTGTGT   | GITR-3-5'      | GAGTGGGACTGCATGTGTGT   | GZMH-1-3'    | GAGCAGTGTGAGCACAAG    |
| HELIOS-1-3'      | ATGGCCCCCTGATCTCATCT   | HELIOS-1-3'    | ATGGCCCCCTGATCTCATCT   | MIP1B-1-5'   | CTGTCTCTCTCTCTCTATGC  |
| HELIOS-2-5'      | CGAAAGGGGAGCACTCCAATA  | HELIOS-2-5'    | CGAAAGGGGAGCACTCCAATA  | MIP1B-1-3'   | GCTGCTCTTTTTGGTTTGG   |
| ICOS-1-3'        | CTGTGCACTAGGATGATAA    | ICOS-1-3'      | CTGTGCACTAGGATGATAA    | PRF1-1-5'    | AACTTTGACGCCAGAGAAC   |
| ICOS-1-5'        | GGACCACTTCTATGCAACAT   | ICOS-2-5'      | GGTACCCATAGGATGTGCAG   | PRF1-1-3'    | GGGTGCCGTAGTTGAGATA   |
| CCR6-1-3'        | CACCAGAATATCCCAAGGA    | CCR6-1-3'      | CACCAGAATATCCCAAGGA    | TNFSF10-1-5' | GACAGACTCGCTGTGAT     |
| CCR6-2-5'        | TACAGCATGTTTTCGACCTC   | CCR6-2-5'      | TACAGCATGTTTTCGACCTC   | TNFSF10-1-3' | CAGCAGGGGCTGTTCATACT  |
| CCR7-1-3'        | ATAGGGAGGAACCAAGCTTT   | CCR7-1-3'      | ATAGGGAGGAACCAAGCTTT   | TNFSF6-2-5'  | GGGATGTTTCACTCTTCCA   |
| CCR7-1-5'        | CAATGAAAAGCGTGTGGT     | CCR7-2-5'      | GTGGTGGCTCTCTGTGAT     | TNFSF6-1-3'  | CAGAGGCATGGACCTTGAT   |
| IL-18_RAP-1-3'   | GGTGAGAGTCAATTTCTGTGG  | IL-18_RAP-1-3' | GGTGAGAGTCAATTTCTGTGG  | CD27-1-5'    | CACTACTGGCTCAGGGAAA   |
| IL-18_RAP-2-5'   | TTGACGAGAGCAATTAATA    | IL-18_RAP-2-5' | TTGACGAGAGCAATTAATA    | CD27-1-3'    | GCGAACGAGAGACAGAGAT   |
| TNF-1-3'         | TGAGGTACAGGCCCTCTGAT   | TNF-1-3'       | TGAGGTACAGGCCCTCTGAT   | CD95-1-5'    | CAAGGGATTGGAATTGAGGA  |
| TNF-1-5'         | CCCCAGGGACTCTCTCTAA    | TNF-2-5'       | CCCCAGGTGACAAGCTGTGAT  | CD95-1-3'    | TGGAAGAAAATGGGCTTTG   |
| IL21-1-3'        | AAGCAGGAAAAGCTGACCA    | IL21-1-3'      | AAGCAGGAAAAGCTGACCA    | TGFB1-1-5'   | ACAGATGGGCTCTGTTTTG   |
| IL21-2-5'        | TGCCACATAGTATGAAATGC   | IL21-2-5'      | TGCCACATAGTATGAAATGC   | TGFB1-1-3'   | CAAGGCCAGGTGATGACTTT  |
| CCR5-1-3'        | GGCCATCTCTGACCTGTTTTT  | CCR5-1-3'      | AAACACAGCATGGAGCAGAG   | TGFB2-1-5'   | TCCACTGTGACAACAGAA    |
| CCR5-1-5'        | AAACACAGCATGGAGCAGAG   | CCR5-2-5'      | GTCCCTCTGGGCTCACTA     | TGFB2-1-3'   | GGAGAAGCAGCATCTCCAG   |
| RORA-4-3'        | GGTCTGCCAGTATCTGCT     | RORA-4-3'      | GGTCTGCCAGTATCTGCT     | FASL-2-5'    | GGGATGTTTCACTCTTCCA   |
| RORA-4-5'        | CACCAGCATCAGGCTCTTT    | RORA-4-5'      | CACCAGCATCAGGCTCTTT    | FASL-1-3'    | GTGGCTATTGCTTCTCCA    |
| GATA3-1-5'       | CCGCCCTACTACGAAACTC    | GATA3-1-5'     | CCGCCCTACTACGAAACTC    | Plk-1-5'     | GTGCACCAAGCCGAGTTAT   |
| GATA3-1-3'       | TTGAGAGAGGGGCTGAGAT    | GATA3-1-3'     | TTGAGAGAGGGGCTGAGAT    | Plk-1-3'     | TCCACACAGGGTCTTCTTC   |
| IL17A-3-3'       | CCGGTTATGGATGTTCAAGT   | IL17A-3-3'     | CCGGTTATGGATGTTCAAGT   | Ube2c-1-5'   | TGGCGATAAAGGATTTCTG   |
| IL17A-3-5'       | TGGGAAGACCTCATTGGTGT   | IL17A-3-5'     | TGGGAAGACCTCATTGGTGT   | Ube2c-1-3'   | GGCGTAGGAAGTCACTGT    |
| IL9-1-3'         | TGTTTGATGTTGGTATTGG    | IL9-1-3'       | TGTTTGATGTTGGTATTGG    | H2afx-1-5'   | TACTCACCCGCTGAGATCT   |
| IL9-2-5'         | CTCATCAACAGATGACGGAAG  | IL9-2-5'       | CTCATCAACAGATGACGGAAG  | H2afx-1-3'   | AGCTGTTGAGCTCTCGTC    |
| IL22-1-3'        | GTTTCAGACCTGCTTCATCA   | IL22-1-3'      | GTTTCAGACCTGCTTCATCA   | Fos-2-5'     | CCGGGATAGCTCTCTTAC    |
| IL22-2-5'        | TCCAGCAGCCCTATACCC     | IL22-2-5'      | TCCAGCAGCCCTATACCC     | Fos-1-3'     | ACTGGTGAAGTGGCAGTG    |
| AHR-1-3'         | GACGCTGAGCTAAGAAGTGA   | AHR-1-3'       | GACGCTGAGCTAAGAAGTGA   | Aurka-2-5'   | GTCACAAGCCGTTTCAAGAT  |
| AHR-2-5'         | TAAAGCCAATCCCACTGAA    | AHR-2-5'       | TAAAGCCAATCCCACTGAA    | Aurka-1-3'   | TTTGATGCCAGTTCTCTCTC  |
| CCR4-1-3'        | AGCCCAACCAAGTACCCAG    | CCR4-1-3'      | AGCCCAACCAAGTACCCAG    | TMEM2-1-5'   | TTGCCAGATCAAAATCTCTC  |
| CCR4-2-5'        | CAAAATACAAGGCGCTCAGT   | CCR4-2-5'      | CAAAATACAAGGCGCTCAGT   | TMEM2-1-3'   | TCCCAATACAAGCAGTCC    |
| GMCSF-1-3'       | AGGGCAGTGCTCTGTAGT     | GMCSF-1-3'     | AGGGCAGTGCTCTGTAGT     |              |                       |
| GMCSF-1-5'       | CACTGCTGCTGAGATGAATGA  | GMCSF-1-5'     | CACTGCTGCTGAGATGAATGA  |              |                       |

**Table S6. Primers used for gene expression analysis of the individual ZnT8<sup>186-194</sup> MMR<sup>+</sup>CD8<sup>+</sup> T cells depicted in Fig. S9A.**

**Members of the ImMaDiab Study Group.**

Jean-Claude Carel, Nadia Tubiana-Rufi, Laetitia Martinerie, Amélie Poidvin, Evelyne Jacqz-Aigrain, Laurence Corvez, Véronique Berruer (Robert Debré Hospital, Paris);  
Jean-François Gautier, Baz Baz (Saint Louis Hospital, Paris);  
Fabrizio Andreelli, Chloé Amouyal, Sophie Jaqueminet, Olivier Bourron, Agnès Hartemann (Pitié-Salpêtrière Hospital, Paris);  
Amal Lemoine-Yazigi, Danièle Dubois-Laforgue (Cochin Hospital, Paris);  
Florence Travert, Michel Marre (Bichat Hospital, Paris);  
Philippe Chanson, Claire Briet (Kremlin-Bicêtre Hospital, Paris);  
Pierre-Jean Guillausseau, Leila Ait-Bachir (Lariboisière Hospital, Paris);  
Carole Collet, Frédéric Beziaud, Gwenaëlle Petit-Aubert (Versailles André Mignot Hospital, Le Chesnay);  
Sophie Christin-Maitre, Bruno Fève, Camille Vatier (Saint Antoine Hospital, Paris);  
Najiba Lahlou (Laboratory of Hormonology, Cochin Hospital, Paris);  
Prissile Bakouboula, Caroline Elie, Hélène Morel, Jean-Marc Treluyer (Clinical Research Unit Paris Centre Descartes, Paris);  
Marie-Claude Gagnerault, Claire Maillard, Anna Jones (INSERM U1016, Cochin Institute, Paris).
